# Supplementary material for: The genomic and functional landscapes of developmental plasticity in the American cockroach
Source: PubMed Central journal article supplement (PMC5861062; doi:10.1038/s41467-018-03281-1), 2018-03-20
Supplement: 41467_2018_3281_MOESM1_ESM.pdf [file 41467_2018_3281_MOESM1_ESM.pdf]

**Supplementary Information**

**The genomic and functional landscapes of developmental plasticity in  
the American cockroach**

**Li et al.**

## Contents

|                              |    |
|------------------------------|----|
| Supplementary Fig. 1 .....   | 4  |
| Supplementary Fig. 2 .....   | 5  |
| Supplementary Fig. 3 .....   | 6  |
| Supplementary Fig. 4 .....   | 7  |
| Supplementary Fig. 5 .....   | 8  |
| Supplementary Fig. 6 .....   | 9  |
| Supplementary Fig. 7 .....   | 10 |
| Supplementary Fig. 8 .....   | 11 |
| Supplementary Fig. 9 .....   | 12 |
| Supplementary Fig. 10 .....  | 13 |
| Supplementary Fig. 11 .....  | 14 |
| Supplementary Fig. 12 .....  | 15 |
| Supplementary Fig. 13 .....  | 16 |
| Supplementary Tables .....   | 17 |
| Supplementary Table 1 .....  | 17 |
| Supplementary Table 2 .....  | 18 |
| Supplementary Table 3 .....  | 19 |
| Supplementary Table 4 .....  | 20 |
| Supplementary Table 5 .....  | 21 |
| Supplementary Table 6 .....  | 22 |
| Supplementary Table 7 .....  | 23 |
| Supplementary Table 8 .....  | 24 |
| Supplementary Table 9 .....  | 25 |
| Supplementary Table 10 ..... | 26 |
| Supplementary Table 11 ..... | 27 |
| Supplementary Table 12 ..... | 30 |
| Supplementary Table 13 ..... | 33 |
| Supplementary Table 14 ..... | 34 |
| Supplementary Table 15 ..... | 35 |
| Supplementary Table 16 ..... | 36 |

|                               |    |
|-------------------------------|----|
| Supplementary Table 17.....   | 38 |
| Supplementary Table 18.....   | 42 |
| Supplementary Table 19.....   | 50 |
| Supplementary Table 20.....   | 53 |
| Supplementary Table 21.....   | 57 |
| Supplementary Table 22.....   | 61 |
| Supplementary Table 23.....   | 62 |
| Supplementary Table 24.....   | 64 |
| Supplementary Table 25.....   | 65 |
| Supplementary Table 26.....   | 66 |
| Supplementary Table 27.....   | 68 |
| Supplementary Table 28.....   | 70 |
| Supplementary Table 29.....   | 72 |
| Supplementary Table 30.....   | 73 |
| Supplementary Table 31.....   | 75 |
| Supplementary References..... | 77 |

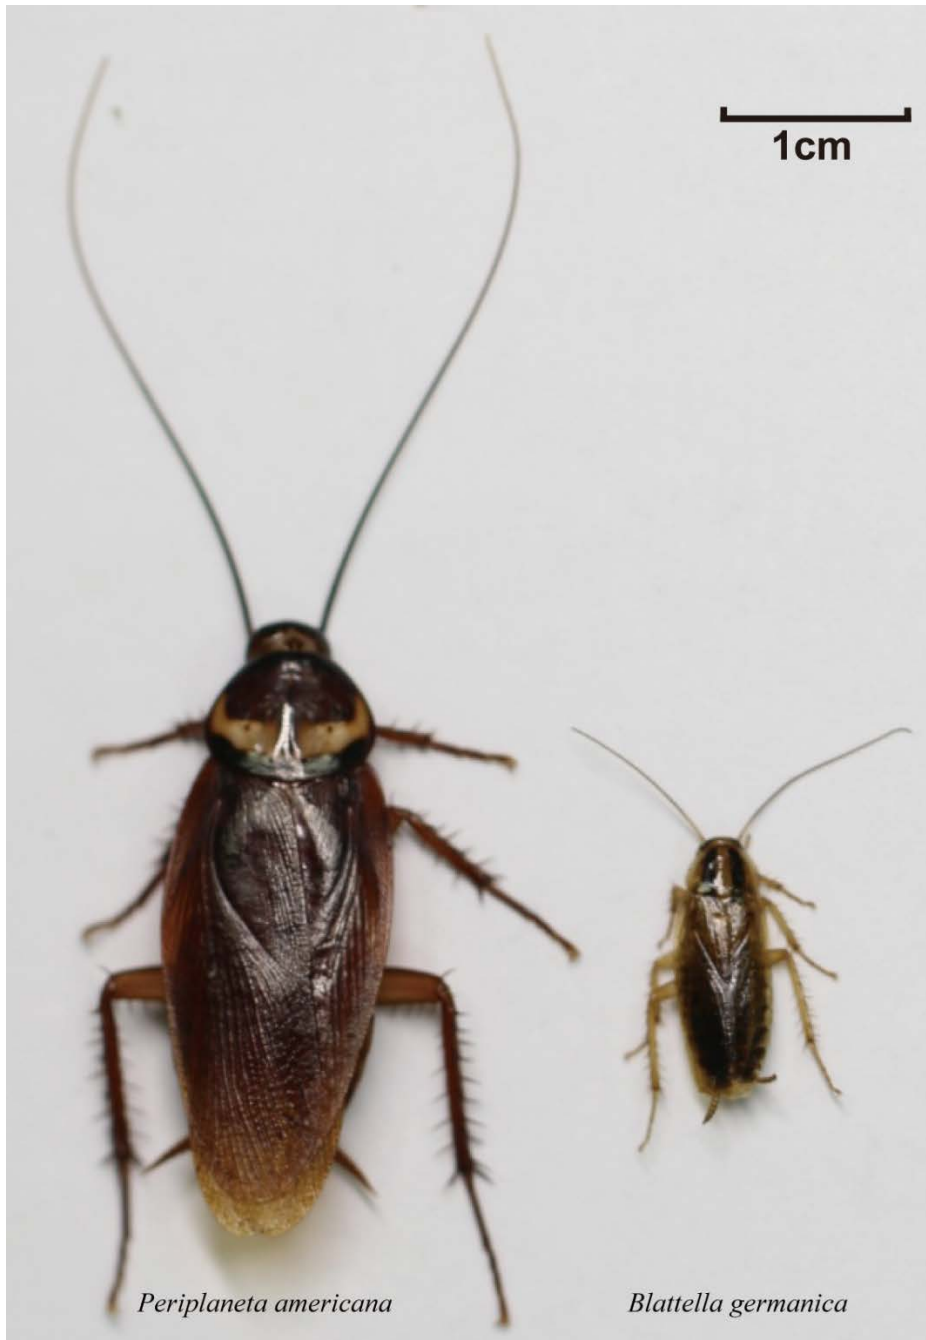

**Supplementary Fig. 1.** Images of female adults of the American cockroach, *Periplaneta americana*, and the German cockroach, *Blattella germanica*.

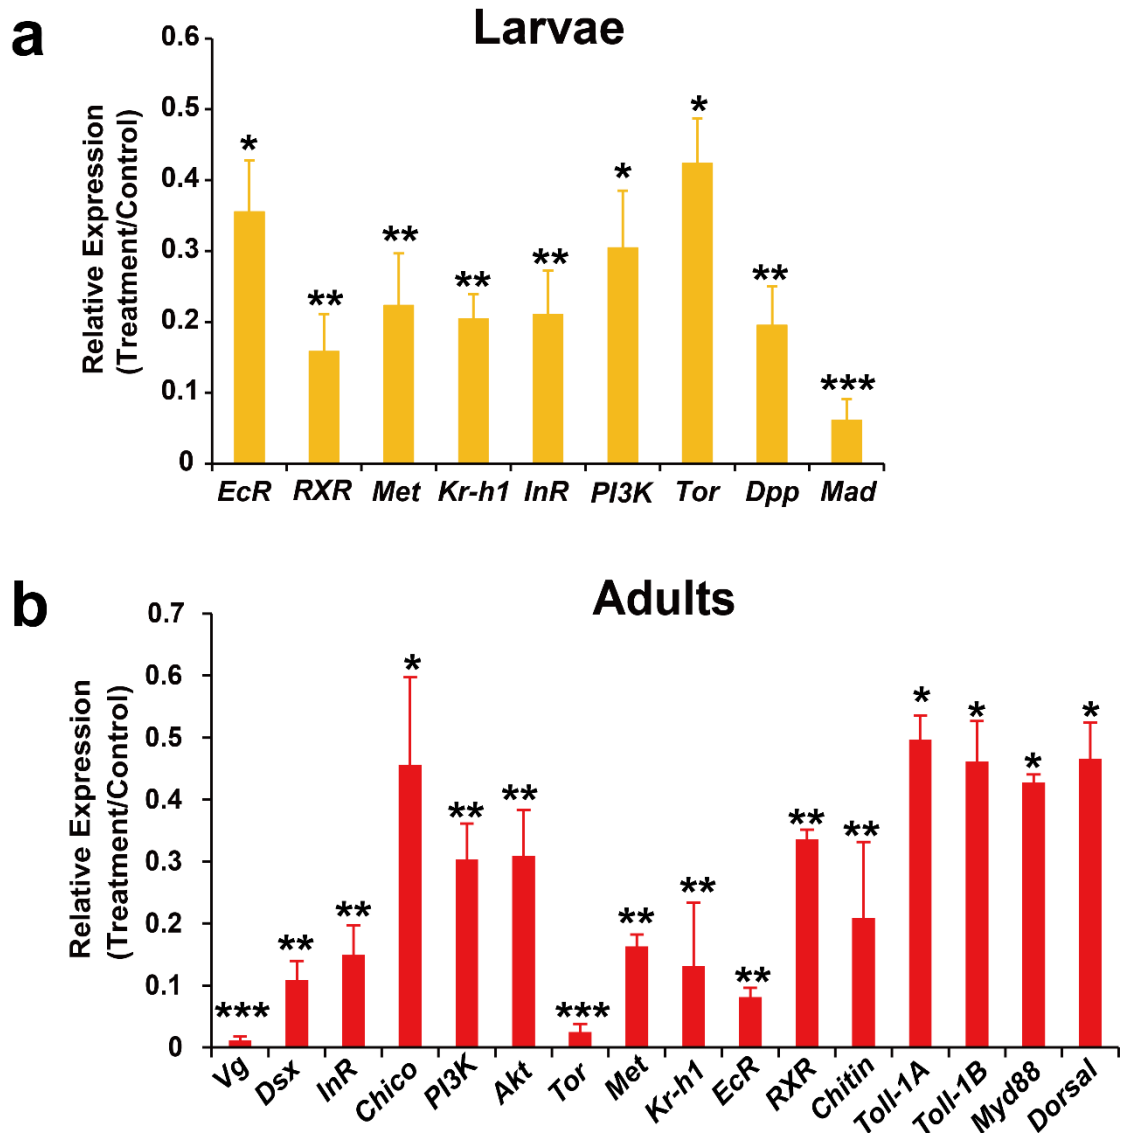

**Supplementary Fig. 2.** The mRNA levels of RNAi target genes were significantly decreased after corresponding dsRNA injection in both larvae (a) and adults (b). The data were calculated as the mean value of three duplications. Error bars represent standard deviation. Student's t-test: \* $p < 0.05$ ; \*\* $p < 0.01$ ; \*\*\* $p < 0.001$ .

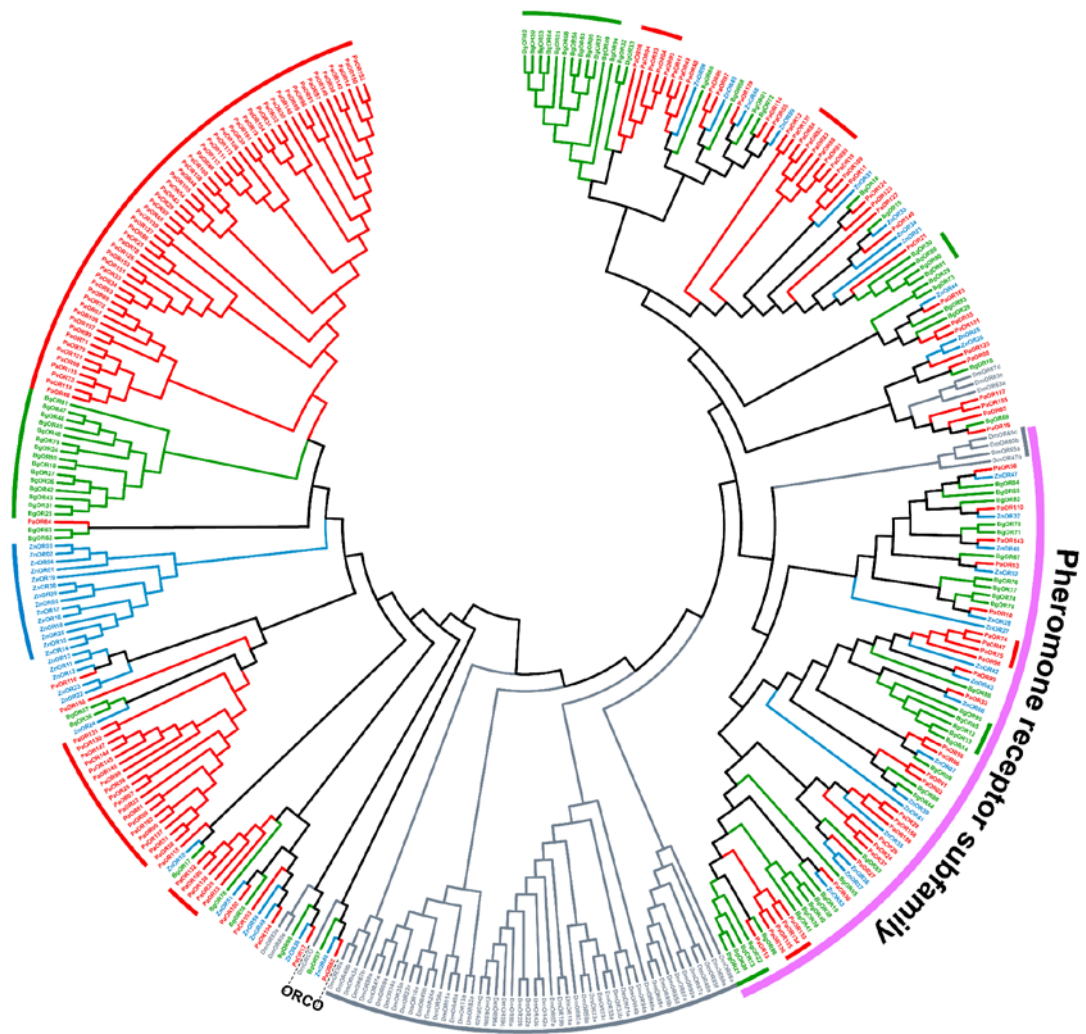

**Supplementary Fig. 3.** Phylogenetic tree of the olfactory receptors (ORs). The phylogenetic analysis was inferred using the Neighbor-joining method involving 353 amino acid sequences. All ambiguous positions were removed for each sequence pair. Color corresponds to that in **Fig. 2**.

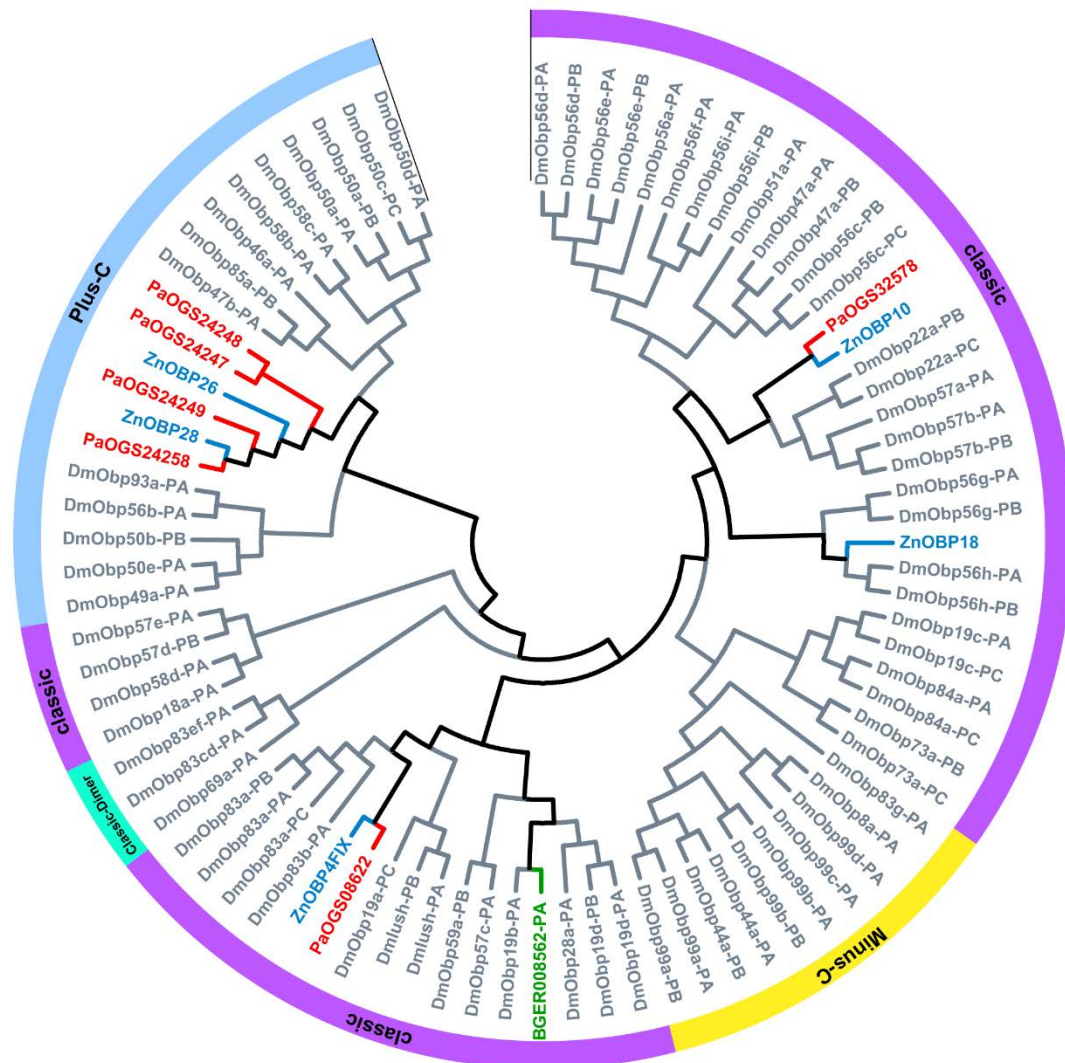

**Supplementary Fig. 4.** Phylogenetic tree of the odorant-binding proteins (OBPs). The Neighbor-joining analysis involved 84 amino acid sequences. Color corresponds to that in Fig. 2.

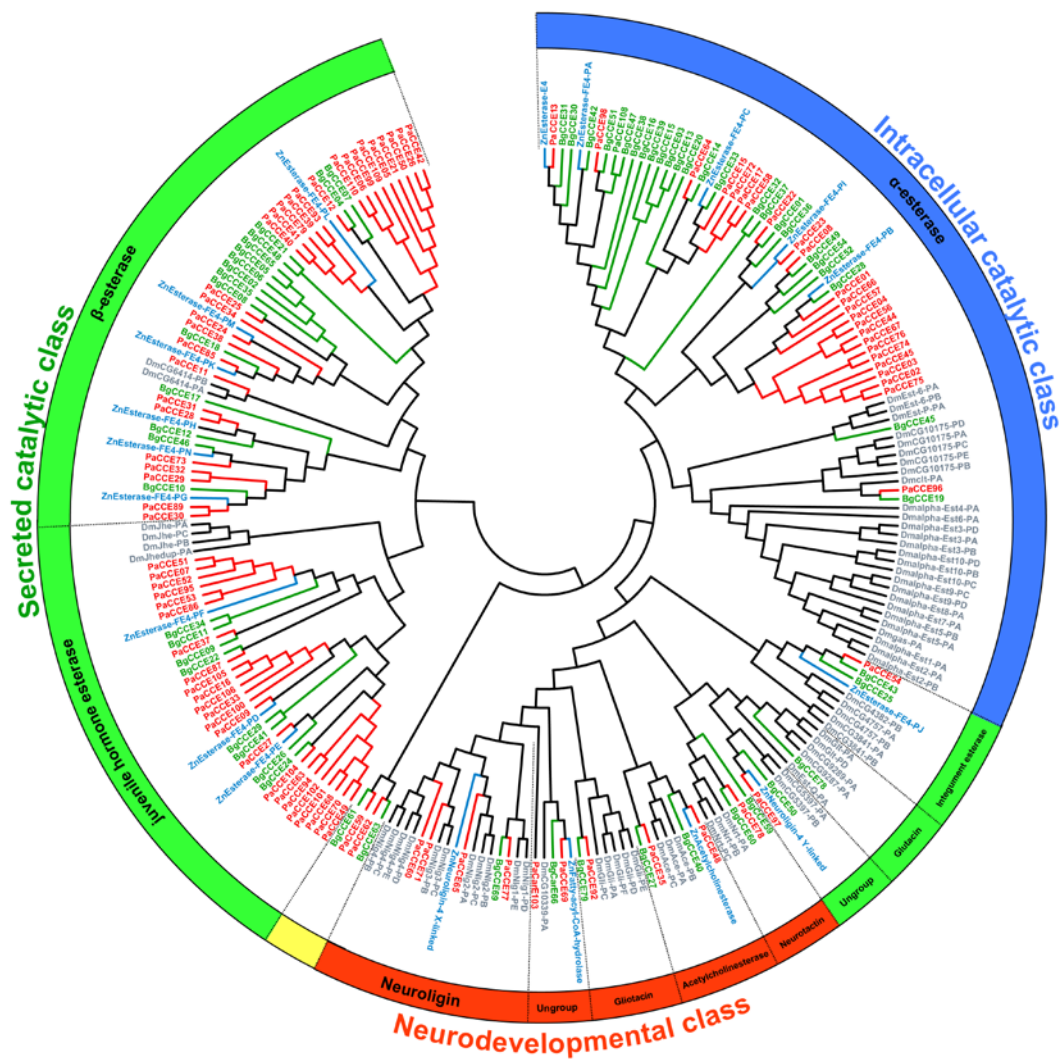

**Supplementary Fig. 5.** Phylogenetic tree of the carboxyl/cholinesterase (CCE) genes. The Neighbor-joining analysis involved 237 amino acid sequences. Color corresponds to that in Fig. 2.



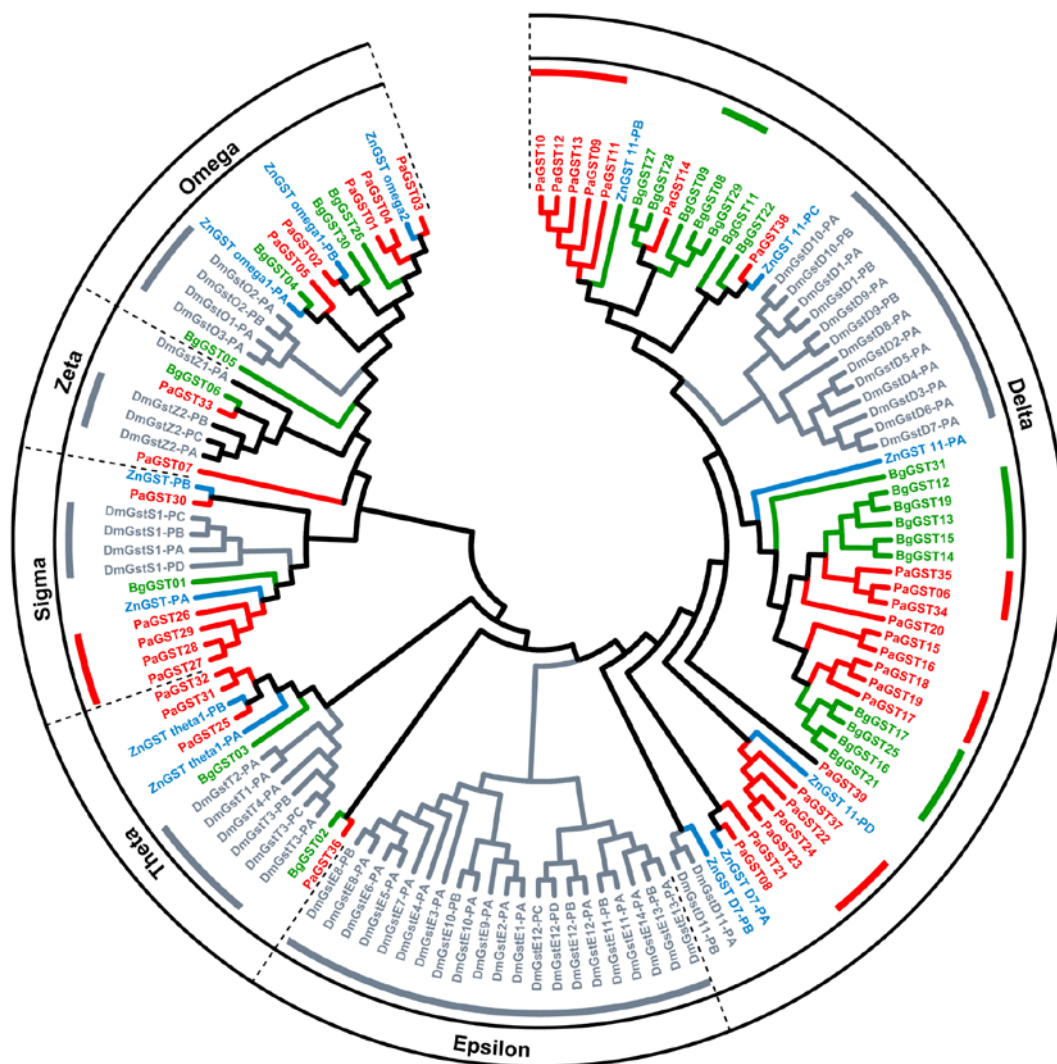

**Supplementary Fig. 6.** Phylogenetic tree of the glutathione-S-transferase's (GST) genes. The Neighbor-joining analysis involved 361 amino acid sequences. Color corresponds to that in Fig. 2.

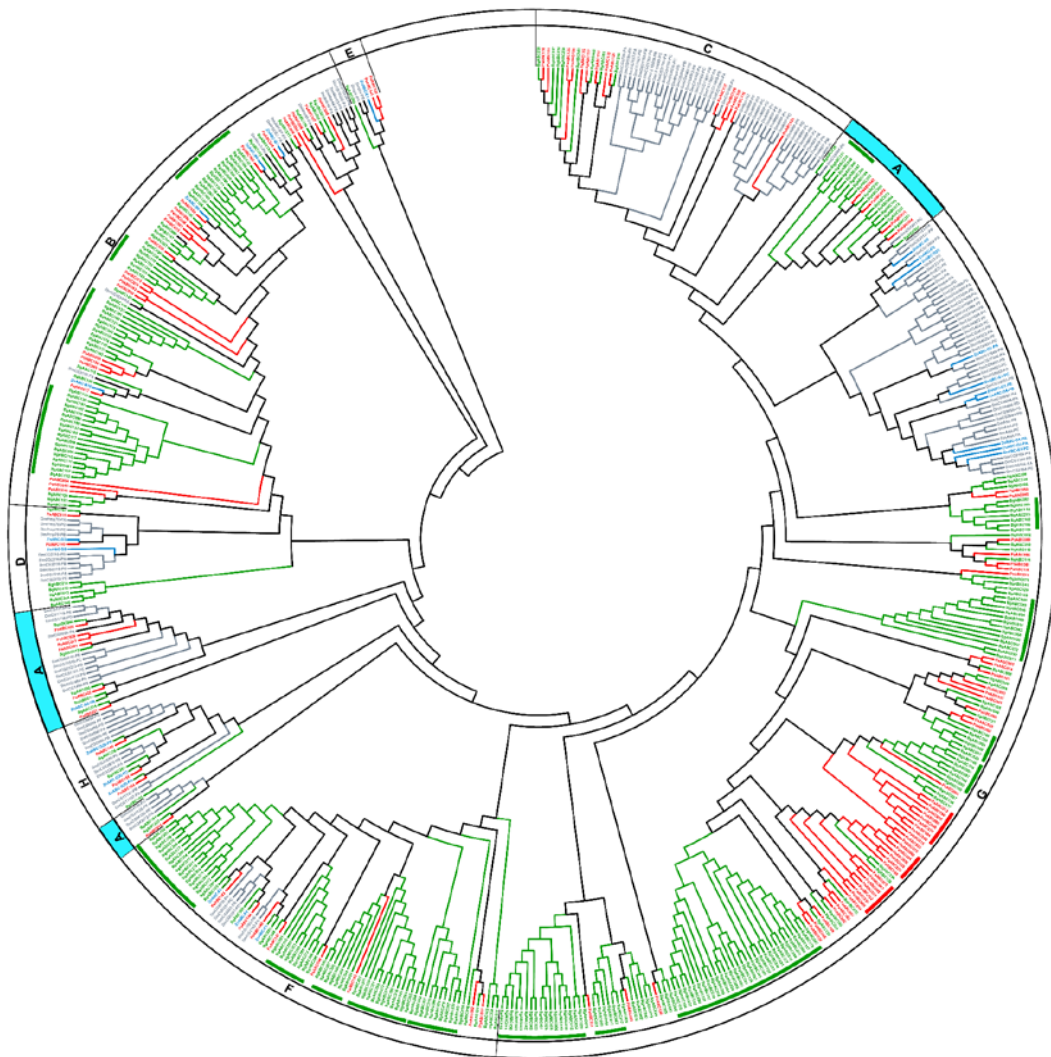

**Supplementary Fig. 7.** Phylogenetic tree of the ABC transporters. The Maximum Likelihood analysis involved 578 amino acid sequences. The bootstrap consensus tree inferred from 100 replicates is taken to represent the evolutionary history of the taxa analyzed. Branches corresponding to partitions reproduced in less than 50% bootstrap replicates are collapsed. Initial tree(s) for the heuristic search were obtained automatically by applying Neighbor-Join and BioNJ algorithms to a matrix of pairwise distances estimated using a JTT model, and then selecting the topology with superior log likelihood value. The analysis involved 578 amino acid sequences. Color corresponds to that in **Fig. 2**.

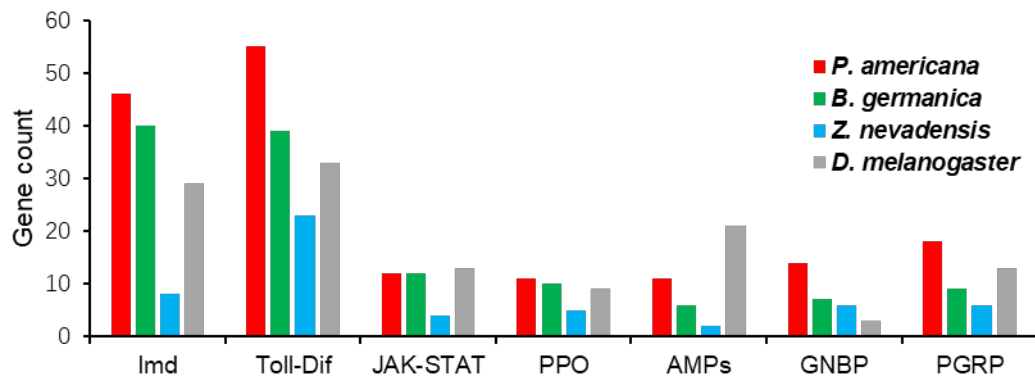

**Supplementary Fig. 8.** Counts of immune-related genes in the genomes of three Blattodea species and *Drosophila*. Imd, Immune Deficiency pathway; Toll, Toll-DIF pathway; JAK-STAT, Janus kinase/signal transducers and activators of transcription pathway; PPO, Insect prophenoloxidase pathway; AMPs, Antimicrobial peptides; GNBP, Gram-negative binding proteins; PGRP, peptidoglycan-recognition proteins.

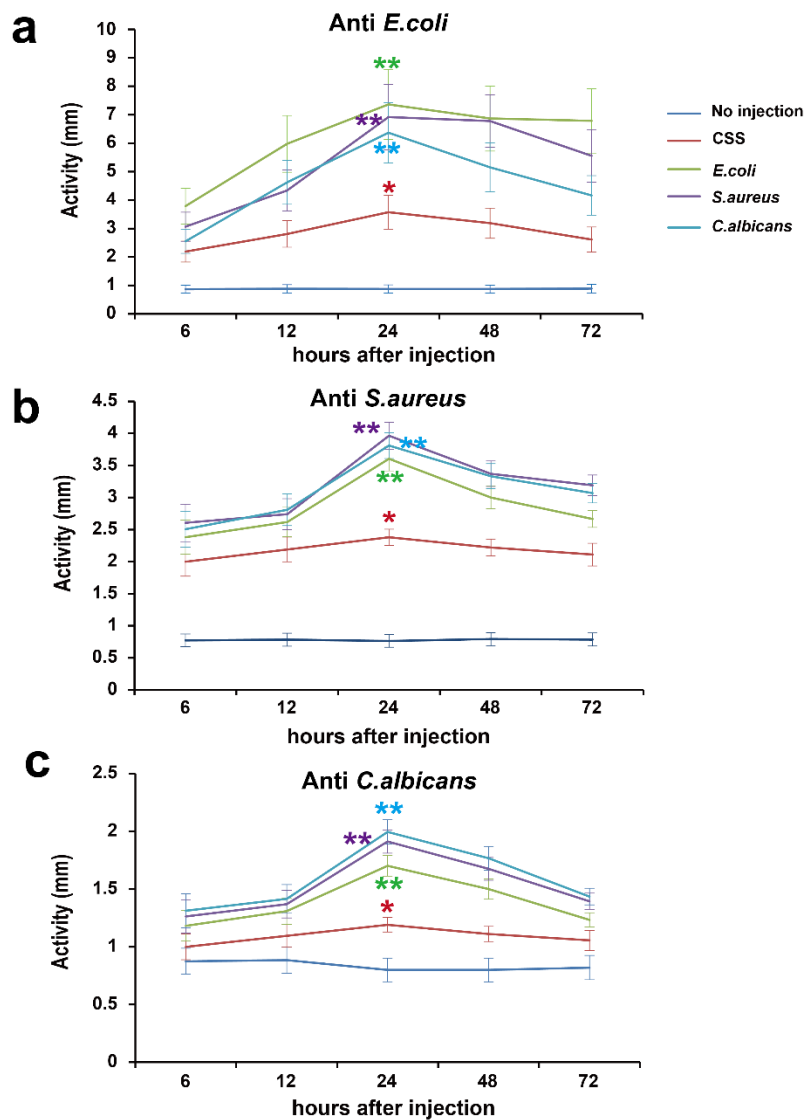

**Supplementary Fig. 9.** Test the induction of AMPs by measuring antimicrobial activity of the cockroach crude extracts after microbe injection. The changes of antimicrobial activity against *E. coli* (a), *S. aureus* (b), and *C. albicans* (c) in the cockroach crude extracts from 6 h to 72 h after injection of CSS, *E. coli*, *S. aureus*, or *C. albicans*. No injection is used for control. The peaks arrive 24 h after injection. Antimicrobial activity is expressed in diameter (mm) of growth inhibition zone. All the data were calculated as the mean value of three replicates. Error bars represent standard deviation. Student's t-test: \* $p < 0.05$ ; \*\* $p < 0.01$ ; \*\*\* $p < 0.001$ .

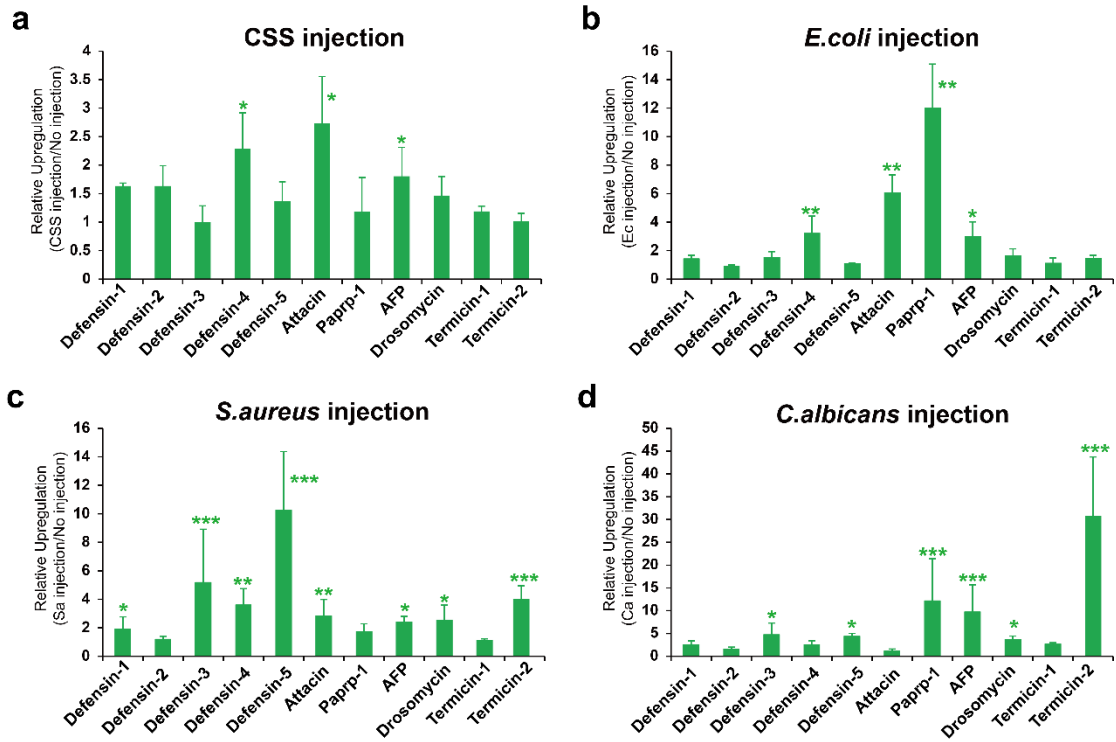

**Supplementary Fig. 10.** Compared to no injection animals, the mRNA levels of 11 AMPs genes are increased after 24 h of injection with CSS (a), *E.coli* (b), *S.aureus* (c), or *C.albicans* (d). All the data were calculated as the mean value of three duplications. Error bars represent standard deviation. Student's t-test: \* $p < 0.05$ ; \*\* $p < 0.01$ ; \*\*\* $p < 0.001$ .

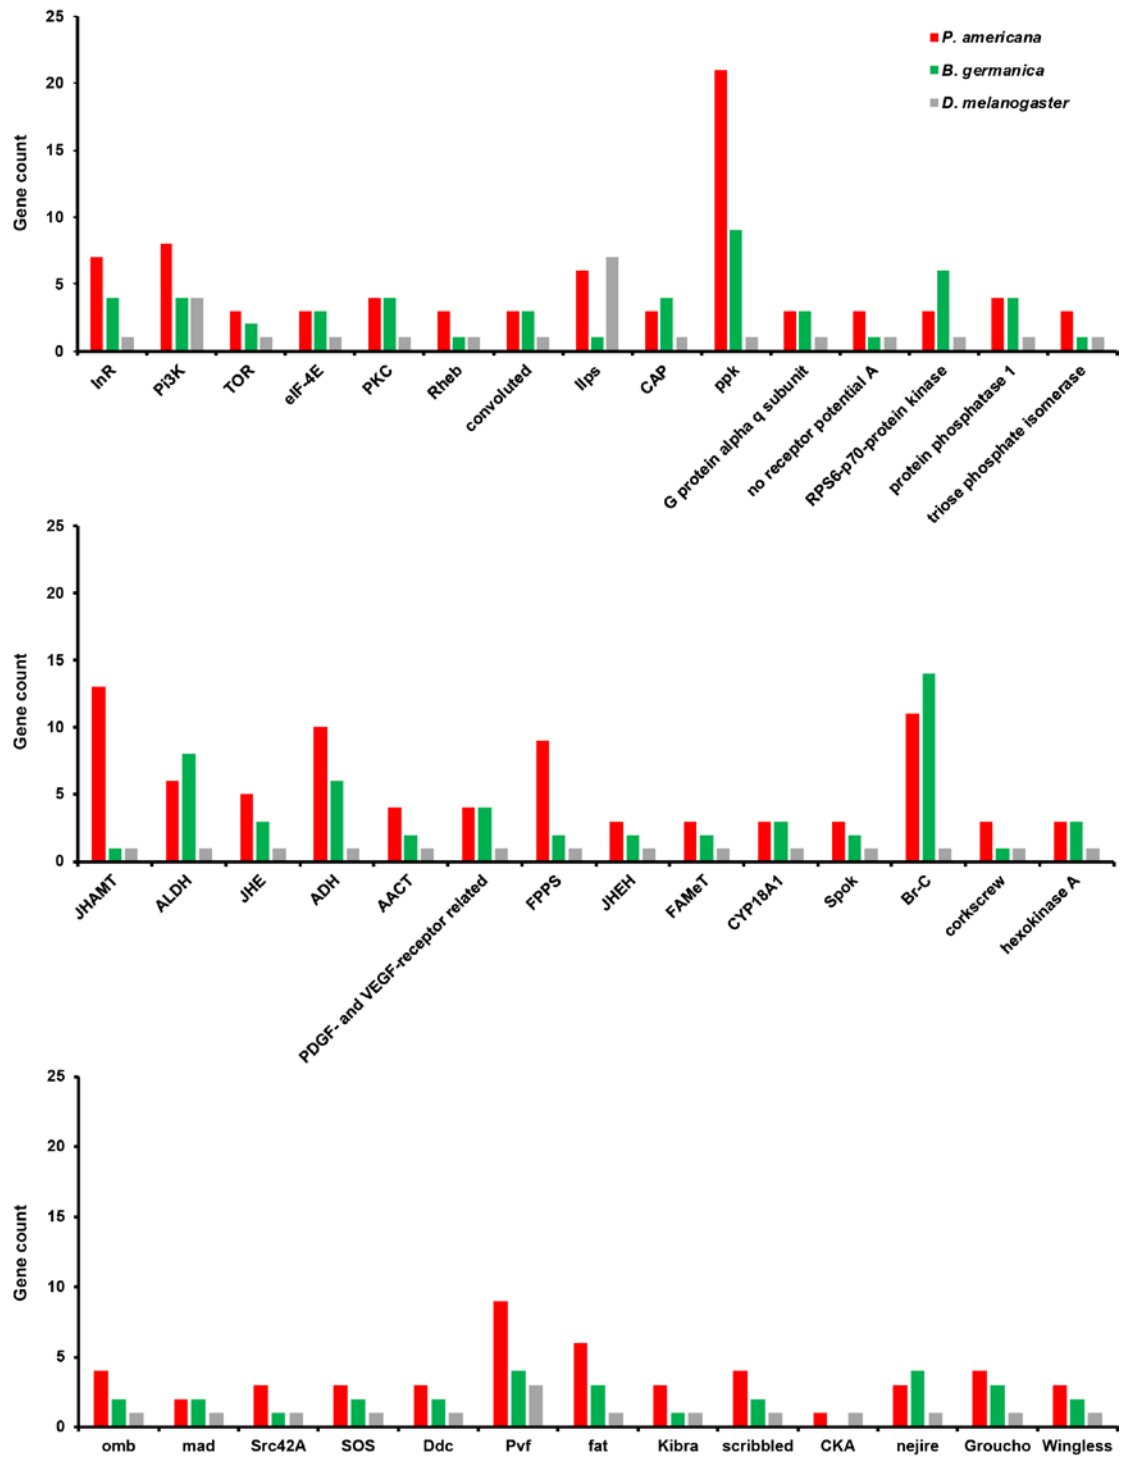

**Supplementary Fig. 11.** List of expanded gene families that are involved in development and regeneration in *P. americana*. These genes were annotated based on orthology.

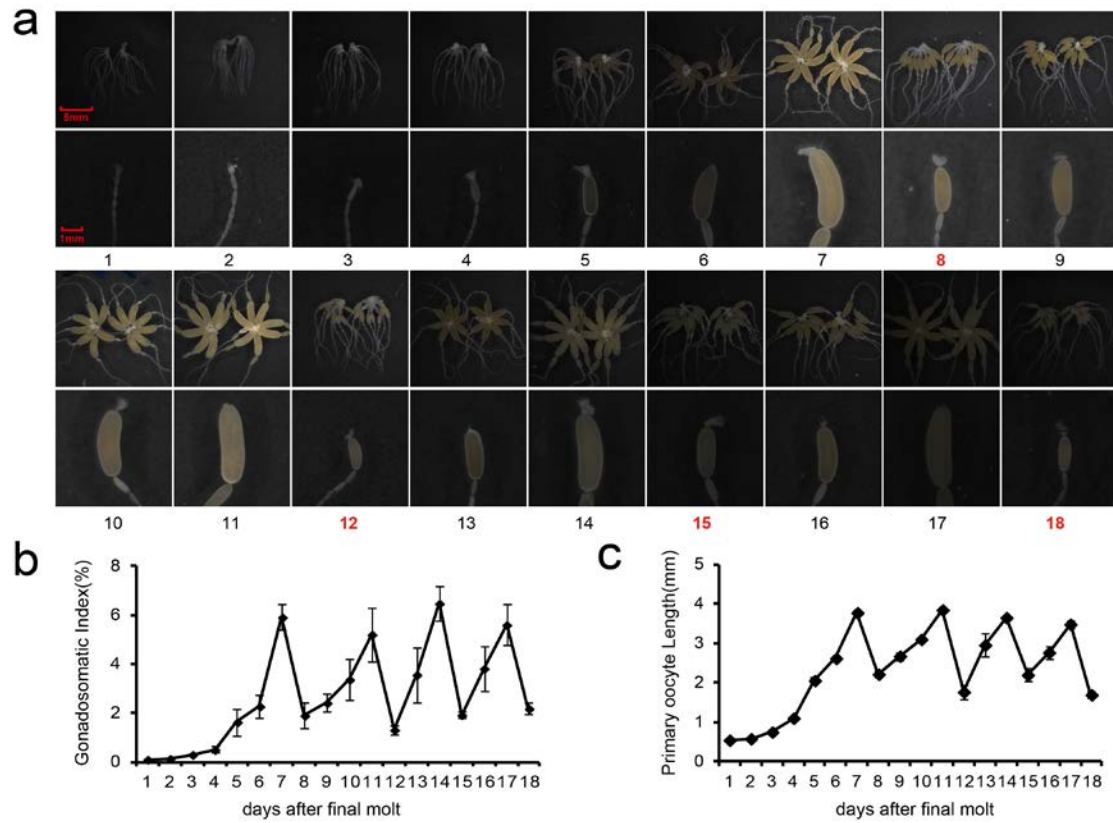

**Supplementary Fig. 12.** Periodically reproductive cycle of ovary in virgin females (a). Whole ovary gonadosomatic index (b) and primary oocyte length (c) were measured. The data were calculated as the mean value of three duplications. Error bars represent standard deviation.

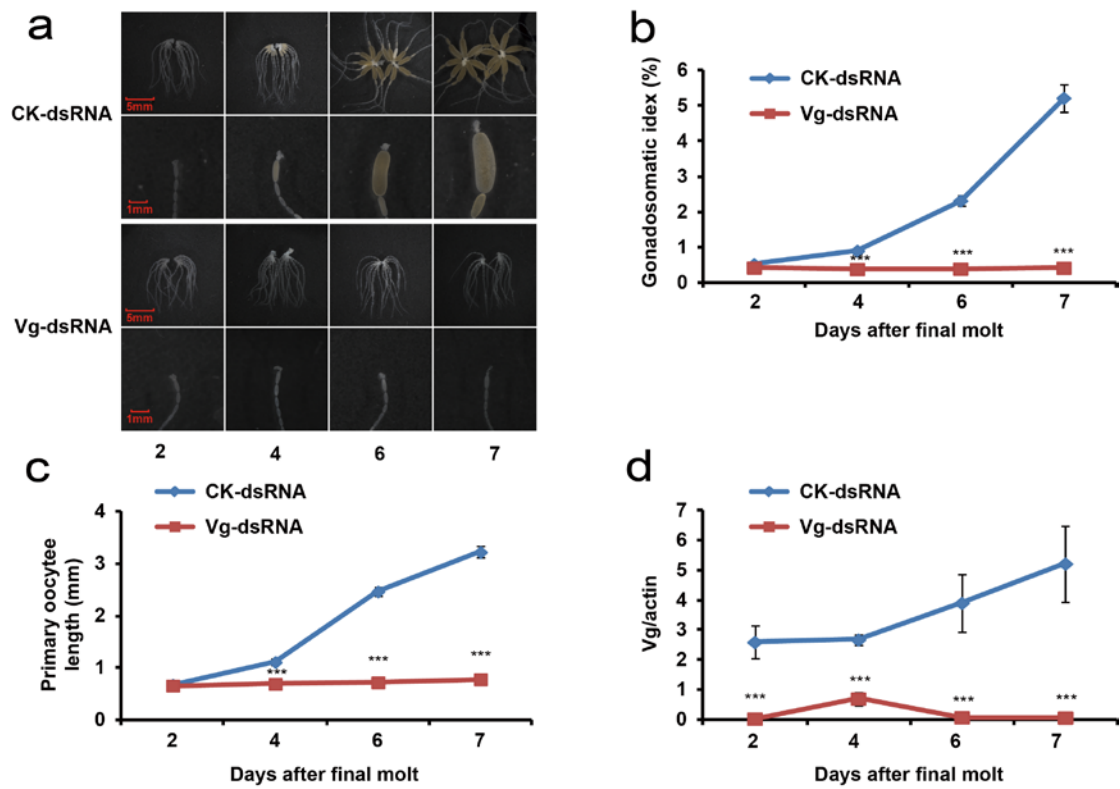

**Supplementary Fig. 13.** Ovary development process under normal and Vg disruption conditions in the first reproductive cycle. RNAi knockdown of Vg completely abolished ovary maturation (a). Whole ovary gonadosomatic index (b), primary oocyte length (c) and Vg/Actin index (d) were calculated in four-time points. The data were calculated as the mean value of three duplications. Error bars represent standard deviation. Student's t-test: \* $p < 0.05$ ; \*\* $p < 0.01$ ; \*\*\* $p < 0.001$ .



## Supplementary Tables

**Supplementary Table 1** Statistics of sequencing data

| Library size<br>(bp)                    | Sequencing<br>length (bp) | Sequencing<br>data (Gb) | Estimated<br>coverage (x) |
|-----------------------------------------|---------------------------|-------------------------|---------------------------|
| <i>P. americana</i>                     |                           |                         |                           |
| 250                                     | 2 * 150                   | 102.2                   | 36.5                      |
| 450                                     | 2 * 250                   | 274.7                   | 98.1                      |
| 600                                     | 2 * 150                   | 157.7                   | 56.3                      |
| 3,000                                   | 2 * 150                   | 86.3                    | 30.9                      |
| 5,000                                   | 2 * 150                   | 88.6                    | 31.6                      |
| 8,000                                   | 2 * 150                   | 56.8                    | 20.3                      |
| 13,000                                  | 2 * 150                   | 59.7                    | 21.3                      |
| <b>Total</b>                            |                           | <b>826.1</b>            | <b>295.0</b>              |
| <i>P. australasiae</i>                  |                           |                         |                           |
| 250                                     | 2 * 150                   | 125.6                   | 44.9                      |
| <i>P. fuliginosa</i>                    |                           |                         |                           |
| 250                                     | 2 * 150                   | 113.1                   | 40.4                      |
| Transcriptome<br>of <i>P. americana</i> |                           |                         |                           |
| 1-2 Kb                                  | Full length               | 5.4                     | -                         |
| 2-3 Kb                                  | Full length               | 4.9                     | -                         |
| 3-6 Kb                                  | Full length               | 7.2                     | -                         |

**Supplementary Table 2** Common features of genome assemblies

|                                   | Pame <sup>1</sup> | Bger <sup>1</sup> | Znev <sup>1</sup> | Mnat <sup>1</sup> | Lmig <sup>1</sup> |
|-----------------------------------|-------------------|-------------------|-------------------|-------------------|-------------------|
| Assembly size (Mb)                | 3,380             | 2,021             | 493               | 1,172             | 6,908             |
| % Gap                             | 4.4               | 16.3              | 4.3               | 4.9               | 15.8              |
| Contig N50 (Kb)                   | 21                | 12                | 20                | 16                | 9                 |
| Scaffold N50 (Kb)                 | 333               | 1,066             | 740               | 1,997             | 326               |
| Scaffold N60 (Kb)                 | 260               | 834               | 585               | 1,578             | 190               |
| Scaffold N70 (Kb)                 | 198               | 608               | 431               | 1,198             | 111               |
| Scaffold N80 (Kb)                 | 143               | 394               | 303               | 829               | 59                |
| Scaffold N90 (Kb)                 | 92                | 154               | 117               | 331               | 19                |
| Longest sequence (Mb)             | 2.4               | 7.5               | 5.1               | 10.8              | 8.2               |
| % BUSCO Completeness <sup>2</sup> | 97.6              | 98.6              | 99.5              | 99.4              | 93.8              |
| % Repeat                          | 57.8              | 46.9              | 2.6 <sup>3</sup>  | 67.1 <sup>3</sup> | 58.9 <sup>3</sup> |
| % G+C                             | 35.7              | 34.5              | 38.2              | 39.8              | 40.7              |

<sup>1</sup> Pame, *Periplaneta americana*; Bger, *Blattella germanica*; Znev, *Zootermopsis nevadensis*; Mnat, *Macrotermes natalensis*; Lmig, *Locusta migratoria*.

<sup>2</sup> Extensive estimation of completeness is shown in **Supplementary Table 3**.

<sup>3</sup> These values were directly adapted as described in Reference 1-3.

**Supplementary Table 3** Quality control of the *P. americana* assembly

| <b>Independent sequence source</b>             | <b>#Total used entries</b> | <b>Recovered by the assembly</b> |                                     |
|------------------------------------------------|----------------------------|----------------------------------|-------------------------------------|
|                                                |                            | <b>#Total recovered counts</b>   | <b>%Median ratio for each entry</b> |
| Clustered long transcriptome reads (PacBio)    | 91,421                     | 90,782 (99.3%)                   | 99.9                                |
| Assembled transcripts by Illumina sequencing   | 130,313                    | 130,128 (99.9%)                  | 100                                 |
| Downloaded ESTs from NCBI                      | 5,315                      | 5,185 (97.6%)                    | 83.5                                |
| Downloaded CDSs from GenBank                   | 327                        | 324 (99.1%)                      | 96.1                                |
| CEGMA conserved proteins ( <i>Drosophila</i> ) | 458                        | 457 (99.8%)                      | 90.0                                |

**Supplementary Table 4** Common features and quality control of gene sets

|                         | Pame <sup>1</sup> | Bger <sup>1</sup>   | Znev <sup>1</sup> | Mnat <sup>1</sup> | Lmig <sup>1</sup> |
|-------------------------|-------------------|---------------------|-------------------|-------------------|-------------------|
| #Protein-coding genes   | 21,336            | 28,141 <sup>2</sup> | 15,860            | 16,310            | 17,586            |
| % Coding                | 0.88              | 1.78                | 4.10              | 1.49              | 0.29              |
| #Single-exon genes      | 2704              | 7984                | 2953              | 6368              | 3163              |
| Med. transcript length  | 987               | 837                 | 891               | 657               | 786               |
| Med. exons per gene     | 4                 | 2                   | 4                 | 2                 | 4                 |
| Med. intron length      | 3005              | 1422                | 736               | 1480              | 6032              |
| Med. transcript length  | 987               | 837                 | 891               | 657               | 786               |
| Completeness estimation |                   |                     |                   |                   |                   |
| % BUSCO complete        | 91.2              | 77.0                | 97.1              | 82.9              | 84.7              |
| % BUSCO partial         | 96.4              | 98.4                | 98.7              | 90.4              | 93.6              |
| % CEGMA recovered       | 98.9              | 99.3                | 99.8              | 98.0              | 96.9              |
| % Med. coverage         | 97.1              | 91.3                | 97.7              | 94.4              | 96.7              |

<sup>1</sup>Pame, *Periplaneta americana*; Bger, *Blattella germanica*; Znev, *Zootermopsis nevadensis*; Mnat, *Macrotermes natalensis*; Lmig, *Locusta migratoria*.

<sup>2</sup>This count refers to the version 0.5.3 that we used for automated analyses in this study, which was frozen on May 2017. In a later version, v0.6.2, the total gene number was slightly changed to 28774 (ref.4).

**Supplementary Table 5** Annotation of *P. americana* gene set

|                     | # Genes<br>with hits | % Ratio of all<br>genes (21,336) |
|---------------------|----------------------|----------------------------------|
| GO terms            | 11,210               | 52.5                             |
| KEGG KO terms       | 12,554               | 58.8                             |
| IPR domains         | 15,312               | 71.8                             |
| Pfam domains        | 14,575               | 68.3                             |
| RefSeq              | 18,286               | 85.7                             |
| UniRef50            | 18,260               | 85.6                             |
| UniProt             | 17,240               | 80.8                             |
| Cockroach (Bger)    | 17,807               | 83.5                             |
| Termite (Znev)      | 17,470               | 81.9                             |
| Fly (Dmel)          | 14,329               | 67.2                             |
| <b>Expressed at</b> |                      |                                  |
| Any stage           | 20,334               | 95.3                             |
| Egg                 | 19,114               | 89.6                             |
| Young larva         | 18,492               | 86.7                             |
| Old larva           | 19,381               | 90.8                             |
| Adult               | 19,158               | 89.8                             |

## Supplementary Table 6 Datasets of other species used in this study

| Species                                         | URL                                   |
|-------------------------------------------------|---------------------------------------|
| <i>Drosophila melanogaster</i>                  | flybase.org                           |
| <i>Danaus plexippus</i> <sup>ref.5</sup>        | monarchbase.umassmed.edu              |
| <i>Tribolium castaneum</i> <sup>ref.6</sup>     | www.bioinformatics.ksu.edu/BeetleBase |
| <i>Apis mellifera</i> <sup>ref.7</sup>          | hymenoptera-genome.org                |
| <i>Bemisia tabaci</i> <sup>ref.8</sup>          | www.whiteflygenomics.org              |
| <i>Rhodnius prolixus</i> <sup>ref.9</sup>       | www.vectorbase.org                    |
| <i>Pediculus humanus</i> <sup>ref.10</sup>      | www.vectorbase.org                    |
| <i>Zootermopsis nevadensis</i> <sup>ref.1</sup> | www.termitegenome.org                 |
| <i>Macrotermes natalensis</i> <sup>ref.2</sup>  | gigadb.org/dataset/100057             |
| <i>Blattella germanica</i> <sup>ref.4</sup>     | NCBI#JPZV00000000                     |
|                                                 | ftp.hgsc.bcm.edu                      |
| <i>Locusta migratoria</i> <sup>ref.3</sup>      | 159.226.67.243                        |

**Supplementary Table 7** Top 20 expanded ortholog families in *P. Americana*

|    | Group    | #Pame | $D^1$ | Annotation                                                  |
|----|----------|-------|-------|-------------------------------------------------------------|
| 1  | MCL10012 | 328   | 121   | kinesin                                                     |
| 2  | MCL10154 | 99    | 97    | ankyrin                                                     |
| 3  | MCL10013 | 147   | 76    | Cuticle protein                                             |
| 4  | MCL10002 | 205   | 59    | P450-CYP3 CYP4                                              |
| 5  | MCL10312 | 45    | 44    | Transcription initiation factor IIE subunit beta            |
| 6  | MCL10088 | 90    | 42    | ionotropic glutamate receptor                               |
| 7  | MCL10227 | 56    | 42    | MFS transporter                                             |
| 8  | MCL10019 | 96    | 40    | Alpha-tocopherol transfer protein-like                      |
| 9  | MCL10408 | 41    | 39    | myosin IX                                                   |
| 10 | MCL10187 | 56    | 30    | Odorant receptor                                            |
| 11 | MCL10024 | 87    | 29    | Juvenile hormone-inducible protein                          |
| 12 | MCL10085 | 81    | 29    | Ionotropic receptor                                         |
| 13 | MCL10026 | 71    | 27    | Hemolymph juvenile hormone binding protein                  |
| 14 | MCL10055 | 53    | 21    | Nose resistant to fluoxetine protein 6                      |
| 15 | MCL10646 | 22    | 21    | Vacuolar protein sorting-associated protein 52-like protein |
| 16 | MCL10078 | 89    | 20    | Lectin-related protein                                      |
| 17 | MCL10077 | 42    | 18    | Lipase                                                      |
| 18 | MCL11673 | 17    | 17    | Dopamine receptor                                           |
| 19 | MCL10073 | 35    | 14    | Elongation of very long chain fatty acids protein           |
| 20 | MCL10640 | 19    | 14    | zinc finger MYM-type protein 1-like                         |

<sup>1</sup> $D$  value indicates the difference of the number of genes in *P. americana* and the maximum value of those in all other 11 species.

**Supplementary Table 8** Significantly enriched pathways (hypergeometric test) for *P. americana* genes that are more closely genetically related with the termite (*Z. nevadensis*)

| Pathway <sup>1</sup>                        | Number | P-value  | Q-value  |
|---------------------------------------------|--------|----------|----------|
| RNA transport                               | 68     | 2.11E-06 | 0.000308 |
| Ribosome biogenesis in eukaryotes           | 49     | 2.03E-06 | 0.000308 |
| Nucleotide excision repair                  | 21     | 1.98E-05 | 0.001927 |
| Homologous recombination                    | 15     | 0.000407 | 0.019823 |
| Apoptosis                                   | 15     | 0.000407 | 0.019823 |
| DNA replication                             | 18     | 0.000947 | 0.039489 |
| Base excision repair                        | 14     | 0.002473 | 0.090256 |
| Protein processing in endoplasmic reticulum | 42     | 0.004642 | 0.112952 |
| Cell cycle                                  | 33     | 0.004515 | 0.112952 |
| RIG-I-like receptor signaling pathway       | 14     | 0.004128 | 0.112952 |
| Toll-like receptor signaling pathway        | 16     | 0.00817  | 0.183513 |
| Endocytosis                                 | 39     | 0.010089 | 0.196408 |
| NF-kappa B signaling pathway                | 9      | 0.011719 | 0.213867 |
| Hippo signaling pathway -fly                | 16     | 0.014066 | 0.228183 |
| Fanconi anemia pathway                      | 16     | 0.016634 | 0.25564  |
| mTOR signaling pathway                      | 19     | 0.017962 | 0.262241 |
| Non-homologous end-joining                  | 7      | 0.022259 | 0.295439 |
| TNF signaling pathway                       | 13     | 0.024123 | 0.306252 |
| Mismatch repair                             | 10     | 0.028494 | 0.34668  |
| Cysteine and methionine metabolism          | 16     | 0.030644 | 0.357925 |

<sup>1</sup> pathways related with human disease were not shown here.



**Supplementary Table 9** Significantly enriched pathways (hypergeometric test) for *P. americana* genes that are more closely genetically related with the cockroach (*B. germanica*)

| Pathway <sup>1</sup>             | Number | P-value  | Q-value  |
|----------------------------------|--------|----------|----------|
| Fc gamma R-mediated phagocytosis | 7      | 0.006772 | 0.987254 |
| Dorso-ventral axis formation     | 6      | 0.010554 | 0.987254 |
| TGF-beta signaling pathway       | 5      | 0.014097 | 0.987254 |
| ErbB signaling pathway           | 5      | 0.034157 | 0.987254 |
| Synaptic vesicle cycle           | 5      | 0.049897 | 0.987254 |

<sup>1</sup> pathways related with human disease were not shown here.

**Supplementary Table 10** Top expanded InterPro domains in the *P. Americana* gene set

| Num | IPR ID    | #Pame | $D^1$ | Information                                           |
|-----|-----------|-------|-------|-------------------------------------------------------|
| 1   | IPR000618 | 214   | 96    | Insect cuticle protein                                |
| 2   | IPR001128 | 272   | 94    | Cytochrome P450                                       |
| 3   | IPR002401 | 188   | 94    | Cytochrome P450, E-class, group I                     |
| 4   | IPR005828 | 172   | 63    | General substrate transporter                         |
| 5   | IPR001320 | 186   | 62    | Ionotropic glutamate receptor                         |
| 6   | IPR000276 | 155   | 36    | G protein-coupled receptor, rhodopsin-like            |
| 7   | IPR001304 | 102   | 34    | C-type lectin                                         |
| 8   | IPR010562 | 82    | 32    | Hemolymph juvenile hormone binding                    |
| 9   | IPR012132 | 63    | 18    | Glucose-methanol-choline oxidoreductase               |
| 10  | IPR011701 | 110   | 17    | Major facilitator superfamily                         |
| 11  | IPR002172 | 46    | 11    | Low-density lipoprotein (LDL) receptor class A repeat |
| 12  | IPR002213 | 83    | 10    | UDP-glucuronosyl/UDP-glucosyltransferase              |
| 13  | IPR010987 | 61    | 10    | Glutathione S-transferase, C-terminal-like            |
| 14  | IPR003663 | 45    | 9     | Sugar/inositol transporter                            |
| 15  | IPR005821 | 48    | 9     | Ion transport domain                                  |
| 16  | IPR002018 | 120   | 8     | Carboxylesterase, type B                              |
| 17  | IPR005804 | 22    | 7     | Fatty acid desaturase, type 1                         |
| 18  | IPR005817 | 18    | 7     | Wnt                                                   |
| 19  | IPR013098 | 104   | 7     | Immunoglobulin I-set                                  |
| 20  | IPR000074 | 8     | 6     | Apolipoprotein A/E                                    |

<sup>1</sup> $D$  value indicates the difference of the number of genes in *P. americana* and the maximum value of those in all other 11 species.

**Supplementary Table 11** The gene list of TOLL pathway

|                                     | <b>Pame<sup>1</sup> ID</b> | <b>Bger<sup>2</sup> ID</b> | <b>Dmel<sup>3</sup> ID</b> | <b>Supplementary notes or annotation</b>   |
|-------------------------------------|----------------------------|----------------------------|----------------------------|--------------------------------------------|
| <b>Ligands and secreted factors</b> |                            |                            |                            |                                            |
| PGRP-SA                             | PaOGS34041                 | Bger_03988                 | NP_572727                  | Peptidoglycan recognition protein SA       |
| PGRP-SD                             | PaOGS17577                 | Bger_21009                 | NP_648145                  | Peptidoglycan recognition protein SD       |
| GNBP1                               | PaOGS26893                 | Bger_06164                 | NP_524142                  | Gram-negative bacteria binding protein 1   |
|                                     | PaOGS26894                 | Bger_27821                 |                            |                                            |
|                                     | PaOGS17659                 | Bger_06148                 |                            |                                            |
|                                     | PaOGS28939                 | Bger_27120                 |                            |                                            |
|                                     | PaOGS16088                 | Bger_25956                 |                            |                                            |
|                                     | PaOGS04407                 |                            |                            |                                            |
|                                     | PaOGS28938                 |                            |                            |                                            |
|                                     | PaOGS16087                 |                            |                            |                                            |
|                                     | PaOGS15533                 |                            |                            |                                            |
|                                     | PaOGS25933                 |                            |                            |                                            |
|                                     | PaOGS25932                 |                            |                            |                                            |
| PaOGS25181                          |                            |                            |                            |                                            |
| GNBP2                               | ND                         | ND                         | NP_524141                  | Gram-negative bacteria binding protein 2   |
| GNBP3                               | PaOGS36768                 | Bger_00528                 | NP_523986                  | Gram-negative bacteria binding protein 3   |
|                                     | PaOGS12546                 | Bger_25957                 |                            |                                            |
| ModSP                               | PaOGS18899                 | Bger_06353                 | NP_536776                  | modular serine protease                    |
| Grass                               | ND                         | ND                         | NP_651543                  | Gram-positive Specific Serine protease     |
| Spirit                              | ND                         | ND                         | NP_572492                  | Serine Protease Immune Response Integrator |

|                 |                                        |                          |              |                                    |
|-----------------|----------------------------------------|--------------------------|--------------|------------------------------------|
| Spz             | PaOGS23351<br>PaOGS15255<br>PaOGS36598 | Bger_09349<br>Bger_09350 | NP_524526    | Spatzle                            |
| Spz2            | PaOGS34707<br>PaOGS06743               | Bger_25455               | NP_729009    | Neurotrophin 1, NT1, dNT1, CG18318 |
| Spz3            | PaOGS32088                             | Bger_14948               | NP_609160    | spatzle 3                          |
| Spz4            | PaOGS29033                             | Bger_01655               | NP_609504    | spatzle 4                          |
| Spz5            | PaOGS14320<br>PaOGS15255<br>PaOGS00122 | Bger_09350               | NP_647753    | spatzle 5, DNT2, NT2               |
| easter          | PaOGS18716<br>PaOGS07008<br>PaOGS20874 | Bger_09760<br>Bger_09770 | NP_524362    | ea                                 |
| SPE             | PaOGS18715                             | Bger_09757               | NP_651168    | Spatzle-Processing Enzyme          |
| <b>Receptor</b> |                                        |                          |              |                                    |
| Toll            | PaOGS03981<br>PaOGS30622               | ND                       | NP_001262995 | T1                                 |
| Toll-2          | PaOGS02723                             | Bger_10640               | NP_476814    | 18 wheeler                         |
| Toll-3          | PaOGS29429                             | Bger_28181               | NP_649719    | MstProx, dTLR3                     |
| Toll-4          | ND                                     | ND                       | NP_523519    | dTLR4, Toll-like                   |
| Toll-5          | ND                                     | ND                       | NP_477438    | Tehao, Dtlr5                       |
| Toll-6          | PaOGS30981<br>PaOGS05166               | Bger_24515<br>Bger_27153 | NP_524081    | dTLR6                              |
| Toll-7          | PaOGS22033                             | Bger_28416               | NP_523797    | dTLR7                              |
| Toll-8          | PaOGS30622<br>PaOGS37362               | Bger_20008<br>Bger_02076 | NP_524757    | Tollo, Dtlr8                       |

|                                    |            |            |              |                                            |
|------------------------------------|------------|------------|--------------|--------------------------------------------|
| Toll-9                             | PaOGS28306 | Bger_03247 | NP_649214    |                                            |
|                                    | PaOGS00449 | Bger_16712 |              |                                            |
|                                    | PaOGS29874 |            |              |                                            |
|                                    | PaOGS29876 |            |              |                                            |
|                                    | PaOGS01025 |            |              |                                            |
| <b>Signal transduction pathway</b> |            |            |              |                                            |
| MyD88 (symbol “9” Figure 3)        | PaOGS03951 | Bger_09614 | NP_610479    | dMyd88, DmMyD88, kra, krapfen              |
| Tube (symbol “10” Figure 3)        | ND         | ND         | NP_001189164 |                                            |
| pelle                              | PaOGS05858 | Bger_18970 | NP_476971    | pll                                        |
|                                    | PaOGS12548 | Bger_20734 |              |                                            |
| Pellino                            | PaOGS18538 | Bger_11668 | NP_524466    | Pli                                        |
|                                    | PaOGS32350 | Bger_19629 |              |                                            |
|                                    | PaOGS18537 | Bger_25292 |              |                                            |
| Cactus                             | PaOGS13946 | Bger_01858 | NP_723960    | cact                                       |
|                                    | PaOGS33742 | Bger_06011 |              |                                            |
|                                    | PaOGS31963 |            |              |                                            |
| Dorsal                             | PaOGS14847 | Bger_22543 | NP_724054    | dl                                         |
| Deaf1                              | PaOGS36637 | Bger_24394 | NP_524169    | Deformed epidermal autoregulatory factor-1 |
| dif*                               | ND         | ND         | NP_001162998 | Dorsal-related immunity factor             |
| Gprk2*                             | PaOGS00819 | Bger_20197 | NP_476867    | G protein-coupled receptor kinase 2        |

<sup>1</sup>Pame, *Periplaneta americana*, <sup>2</sup>Bger, *Blattella germanica*, <sup>3</sup>Dmel, *Drosophila melanogaster*. \* = gene not shown in the Figure 3a because it's not in the main pathway.

**Supplementary Table 12** The gene list of IMD pathway

|                                           | <b>Pame<sup>1</sup> ID</b>                                                                                   | <b>Bger<sup>2</sup> ID</b>             | <b>Dmel<sup>3</sup> ID</b> | <b>Supplementary notes or annotation</b> |
|-------------------------------------------|--------------------------------------------------------------------------------------------------------------|----------------------------------------|----------------------------|------------------------------------------|
| <b>Ligands and extracellular proteins</b> |                                                                                                              |                                        |                            |                                          |
| PGRP-SB1                                  | PaOGS09251                                                                                                   | Bger_21011                             | NP_648917                  | Peptidoglycan recognition protein SB1    |
| PGRP-SB2                                  | PaOGS12466                                                                                                   | Bger_07207                             | NP_001261970               | Peptidoglycan recognition protein SB2    |
| PGRP-SC1a                                 | PaOGS08236                                                                                                   | Bger_12586                             | NP_610407                  | Peptidoglycan recognition protein SC1a   |
| PGRP-SC1b                                 | ND                                                                                                           | ND                                     | NP_610409                  | Peptidoglycan recognition protein SC1b   |
| PGRP-SC2                                  | PaOGS00830                                                                                                   | Bger_12080                             | NP_610410                  | Peptidoglycan recognition protein SC2    |
| PGRP-LB                                   | PaOGS35371<br>PaOGS19147<br>PaOGS19148<br>PaOGS10768<br>PaOGS35369<br>PaOGS00826<br>PaOGS17579<br>PaOGS15599 | Bger_07207<br>Bger_07208               | NP_001247052               | Peptidoglycan recognition protein LB     |
| PGRP-LE                                   | PaOGS25508                                                                                                   | Bger_21009                             | NP_573078                  | Peptidoglycan recognition protein LE     |
| PGRP-LF                                   | PaOGS28006<br>PaOGS01447                                                                                     | Bger_21010<br>Bger_12586<br>Bger_15019 | NP_648299                  | Peptidoglycan recognition protein LF     |

| <b>Receptor</b>                    |            |            |              |                                                                          |
|------------------------------------|------------|------------|--------------|--------------------------------------------------------------------------|
| PGRP-LC                            | PaOGS28008 | Bger_21011 | NP_648298    | Peptidoglycan recognition protein LC                                     |
| <b>Signal transduction pathway</b> |            |            |              |                                                                          |
| imd                                | PaOGS00913 | ND         | NP_573394    | immune deficiency                                                        |
| Pirk                               | PaOGS00402 | Bger_00547 | NP_611598    | poor Imd response upon knock-in                                          |
| FADD                               | PaOGS28864 | Bger_00847 | NP_651006    | Fas-associated death domain                                              |
| DREDD                              | PaOGS31167 | Bger_14092 | NP_477249    | Death related ced-3/Nedd2-like caspase                                   |
| Dnr1                               | PaOGS16033 | Bger_09439 | NP_001261137 | defense repressor 1                                                      |
| Relish                             | PaOGS33475 | Bger_13050 | NP_477094    | Rel, NF- $\kappa$ B, ird4                                                |
| caspar                             | PaOGS04016 | Bger_10382 | NP_611080    | casp                                                                     |
| Sickie                             | PaOGS25134 | Bger_19906 | NP_001260606 | sick                                                                     |
|                                    | PaOGS15258 | Bger_27334 |              |                                                                          |
| ben                                | PaOGS21776 | Bger_14002 | NP_511150    | bendless , Ubc13, UbcD3                                                  |
|                                    | PaOGS19014 | Bger_18381 |              |                                                                          |
| Effete                             | PaOGS20997 | Bger_12667 | NP_731941    | Effete, UbcD1, UbcD, E(Pc)88D, UBC4, ms(3)88D                            |
| TAK1                               | PaOGS13569 | Bger_05441 | NP_524080    | TGF- $\beta$ activated kinase 1                                          |
| Tab2                               | PaOGS00384 | Bger_07566 | NP_611408    | TAK1-associated binding protein 2                                        |
| Key                                | PaOGS01862 | Bger_22316 | NP_523856    | kenny,IKK $\gamma$ , DmIKK $\gamma$ , Kenny, IKK, IKKg                   |
| Ird5                               | PaOGS10933 | Bger_00233 | NP_524751    | I-kappaB kinase $\beta$ , DmIkk $\beta$ , IKK $\beta$ , IKKb, IRD-5, IKK |
| kay                                | PaOGS04497 | Bger_03487 | NP_001027577 | kayak,Fos, DFos, D-Fos, AP-1, dFRA, CG15507, CG15509, c-Fos, API, fra    |
| Stat92E                            | PaOGS14791 | Bger_06093 | NP_001262760 | Signal-transducer and activator of transcription protein at 92E          |
|                                    | PaOGS11542 | Bger_19443 |              |                                                                          |
| Iap2                               | PaOGS03160 | Bger_00682 | NP_477127    | Death-associated inhibitor of apoptosis 2                                |

|         |            |            |           |                                                                         |
|---------|------------|------------|-----------|-------------------------------------------------------------------------|
|         | PaOGS03203 | Bger_09439 |           | also known as D-IAP2, DIAP-2, DIHA                                      |
|         | PaOGS05706 | Bger_01768 |           |                                                                         |
|         | PaOGS16033 | Bger_01770 |           |                                                                         |
|         | PaOGS17338 | Bger_14494 |           |                                                                         |
|         | PaOGS21965 | Bger_11620 |           |                                                                         |
|         | PaOGS29236 | Bger_15389 |           |                                                                         |
|         | PaOGS31717 | Bger_20862 |           |                                                                         |
|         | PaOGS32827 |            |           |                                                                         |
| Akirin* | PaOGS28957 | Bger_14274 | NP_648113 | bhr                                                                     |
| HDAC1*  | PaOGS04186 | Bger_01952 | NP_647918 | Histone deacetylase 1, rpd3, dHDAC1, DRpd3, HDAC, l(3)04556, Su(var)326 |
| Bsk*    | PaOGS14087 | Bger_26268 | NP_723541 | JNK, DJNK, D-JNK, pJNK, basket                                          |

<sup>1</sup>Pame, *Periplaneta americana*, <sup>2</sup>Bger, *Blattella germanica*, <sup>3</sup>Dmel, *Drosophila melanogaster*. \* = gene not shown in the Figure 3a because it's not in the main pathway.



**Supplementary Table 13** The gene list of JAK-STAT pathway

|                                     | Pame <sup>1</sup> ID | Bger <sup>2</sup> ID | Dmel <sup>3</sup> ID | Supplementary notes or annotation                                |
|-------------------------------------|----------------------|----------------------|----------------------|------------------------------------------------------------------|
| <b>Ligands and secreted factors</b> |                      |                      |                      |                                                                  |
| Upd1                                | ND                   | ND                   | NP_525095            | unpaired 1                                                       |
| Upd2                                | ND                   | ND                   | NP_573277            | unpaired 2                                                       |
| Upd3                                | ND                   | ND                   | NP_001097014         | unpaired 3                                                       |
| <b>Receptor</b>                     |                      |                      |                      |                                                                  |
| dome                                | PaOGS14246           | Bger_01267           | NP_523412            | domeless                                                         |
| <b>Signal transduction pathway</b>  |                      |                      |                      |                                                                  |
| Hop                                 | PaOGS29402           | Bger_18756           | NP_511119            | Jak, hopscotch                                                   |
| Stat92E                             | PaOGS14791           | Bger_06093           | NP_001262760         | Signal-transducer and activator of transcription protein at 92E. |
| PIAS                                | PaOGS36496           | Bger_11142           | NP_724749            | Suppressor of variegation 2-10                                   |
| RanBP3                              | PaOGS32875           | Bger_12731           | NP_651178            | Ran binding protein 3                                            |
| Ptp61F                              | PaOGS11757           | Bger_26148           | NP_476687            | Protein tyrosine phosphatase 61F                                 |
| Socs36E                             | PaOGS24594           | Bger_05239           | NP_523593            | Suppressor of cytokine signaling at 36E                          |
| ken                                 | PaOGS26381           | Bger_23824           | NP_523833            | ken and barbie                                                   |
| Cnot4                               | PaOGS20210           | Bger_01413           | NP_001260343         | CCR4-NOT transcription complex subunit 4, NOT4                   |
| EloB*                               | PaOGS25195           | Bger_23739           | NP_524416            | Elongin B                                                        |
| EloC*                               | PaOGS05017           | Bger_25099           | NP_725894            | Elongin C                                                        |
| Cullin 5*                           | PaOGS28614           | Bger_07822           | NP_651665            | cul-5, CUL5                                                      |

<sup>1</sup> Pame, *Periplaneta americana*, <sup>2</sup> Bger, *Blattella germanica*, <sup>3</sup> Dmel, *Drosophila melanogaster*. \* = gene not shown in the Figure 3a because it's not in the main pathway.

**Supplementary Table 14** The gene list of PPO and its associated genes

|                | <b>Pame<sup>1</sup> ID</b>                           | <b>Bger<sup>2</sup> ID</b>             | <b>Dmel<sup>3</sup> ID</b> | <b>Supplementary notes or annotation</b> |
|----------------|------------------------------------------------------|----------------------------------------|----------------------------|------------------------------------------|
| <b>Sp7</b>     | ND                                                   | ND                                     | NP_649734                  | Serine protease 7, MP2, PAE1             |
| <b>Spn27A</b>  | PaOGS25165                                           | Bger_11362                             | NP_652024                  | Serpin 27A                               |
| <b>Spn28Dc</b> | PaOGS02715                                           | Bger_24516<br>Bger_04527               | NP_609172                  | Serpin 28Dc, spn28D                      |
| <b>Spn77Ba</b> | PaOGS01312                                           | Bger_15289                             | NP_649205                  | Serpin 77Ba                              |
| <b>Hayan</b>   | ND                                                   | ND                                     | NP_001097020               |                                          |
| <b>MP1</b>     | PaOGS14968<br>PaOGS20874<br>PaOGS27348<br>PaOGS18714 | Bger_09767<br>Bger_09770<br>Bger_09757 | NP_001303421               | Melanization Protease 1                  |
| <b>PPO1</b>    | ND                                                   | ND                                     | NP_476812                  | Prophenoloxidase 1                       |
| <b>PPO2</b>    | PaOGS19761<br>PaOGS19762                             | Bger_20290<br>Bger_20291               | NP_610443                  | Prophenoloxidase 2                       |
| <b>PPO3</b>    | PaOGS33075<br>PaOGS33082                             | Bger_00852                             | NP_524760                  | Prophenoloxidase 3                       |

<sup>1</sup> Pame, *Periplaneta americana*, <sup>2</sup> Bger, *Blattella germanica*, <sup>3</sup> Dmel, *Drosophila melanogaster*.

**Supplementary Table 15** The gene list of AMPs

|                          | <b>Pame<sup>1</sup> ID</b>                                                | <b>Bger<sup>2</sup> ID</b>             | <b>Dmel<sup>3</sup> ID</b> | <b>Supplementary notes or annotation</b> |
|--------------------------|---------------------------------------------------------------------------|----------------------------------------|----------------------------|------------------------------------------|
| <b>AFP</b>               | PaOGS35945                                                                | ND                                     | ND                         |                                          |
| <b>Attacin-A</b>         | PaOGS36940                                                                | ND                                     | NP_523745                  |                                          |
| <b>Defensin</b>          | PaOGS22104<br>PaOGS22105<br>PaOGS25963<br>PaOGS25964<br>PaOGS25965        | Bger_22590<br>Bger_24006               | NP_523672                  |                                          |
| <b>Drosomycin</b>        | PaSCF26382 17981—18112                                                    | Bger_12810                             | NP_523901                  |                                          |
| <b>Pro-rich peptides</b> | PaSCF10328 901670----901774                                               | ND                                     | ND                         |                                          |
| <b>termicin</b>          | PaSCF17378 12249-12097(termicin-1 )<br>PaSCF17378 43696-43598(termicin-2) | Bger_00758<br>Bger_26761<br>Bger_26762 | ND                         |                                          |

<sup>1</sup>Pame, *Periplaneta americana*, <sup>2</sup>Bger, *Blattella germanica*, <sup>3</sup>Dmel, *Drosophila melanogaster*.

**Supplementary Table 16** The gene list of 20E pathway

|                                  | <b>Pame<sup>1</sup> ID</b>                                                                                                                             | <b>Bger<sup>2</sup> ID</b>                                                                                                                                           | <b>Dmel<sup>3</sup> ID</b> | <b>Supplementary notes or annotation</b> |
|----------------------------------|--------------------------------------------------------------------------------------------------------------------------------------------------------|----------------------------------------------------------------------------------------------------------------------------------------------------------------------|----------------------------|------------------------------------------|
| <b>Ecdysone receptor</b>         |                                                                                                                                                        |                                                                                                                                                                      |                            |                                          |
| <b>EcR</b>                       | PaOGS33228                                                                                                                                             | Bger_08790                                                                                                                                                           | NP_724460                  | ecdysone receptor                        |
| <b>USP</b>                       | PaOGS21233<br>PaOGS36136                                                                                                                               | Bger_15477                                                                                                                                                           | NP_476781                  | ecdysone receptor                        |
| <b>20E primary response gene</b> |                                                                                                                                                        |                                                                                                                                                                      |                            |                                          |
| <b>E75</b>                       | PaOGS33408                                                                                                                                             | Bger_26014                                                                                                                                                           | NP_730321                  | ecdysone-induced protein                 |
| <b>E74</b>                       | PaOGS20118<br>PaOGS31546                                                                                                                               | Bger_22825<br>Bger_11041                                                                                                                                             | NP_730288                  | ecdysone-induced protein                 |
| <b>Br-C</b>                      | PaOGS00309<br>PaOGS02465<br>PaOGS05966<br>PaOGS17094<br>PaOGS17458<br>PaOGS24449<br>PaOGS28676<br>PaOGS31102<br>PaOGS32246<br>PaOGS34612<br>PaOGS34937 | Bger_00841<br>Bger_03570<br>Bger_03579<br>Bger_04067<br>Bger_04233<br>Bger_06368<br>Bger_12704<br>Bger_15807<br>Bger_15950<br>Bger_18118<br>Bger_22239<br>Bger_22365 | NP_001162638               | ecdysone-induced protein                 |

|                                                 |                                        |                                        |              |                                                                                  |
|-------------------------------------------------|----------------------------------------|----------------------------------------|--------------|----------------------------------------------------------------------------------|
|                                                 |                                        | Bger_26295                             |              |                                                                                  |
|                                                 |                                        | Bger_27201                             |              |                                                                                  |
| <b>E93</b>                                      | PaOGS00579                             | Bger_11783<br>Bger_22028               | NP_001262817 | ecdysone-induced protein                                                         |
| <b>Hr3</b>                                      | PaOGS31710                             | Bger_00728                             | NP_001334718 | steroid hormone mediated signaling pathway                                       |
| <b>Ftz-F1</b>                                   | PaOGS36905<br>PaOGS36906               | Bger_09988                             | NP_524143    | steroid hormone mediated signaling pathway                                       |
| <b>Ecdysone biosynthesis and biodegradation</b> |                                        |                                        |              |                                                                                  |
| <b>Nvd</b>                                      | PaOGS33111                             | Bger_22030                             | NP_001097670 | Converts cholesterol to 7-dehydrocholesterol                                     |
| <b>Spo/Spok</b>                                 | PaOGS14459<br>PaOGS34772<br>PaOGS28150 | Bger_04901<br>Bger_25648               | NP_647975    | Converts 7-dehydrocholesterol to 2,22,25-trideoxyecdysone(ketodiol)              |
| <b>Phm</b>                                      | PaOGS32253<br>PaOGS25093               | Bger_21433                             | NP_573319    | Converts 2,22,25-trideoxyecdysone (ketodiol) to 22,2-dideoxyecdysone (ketotriol) |
| <b>Dib</b>                                      | PaOGS32929                             | Bger_24331                             | NP_524810    | Converts 22,2-dideoxyecdysone (ketotriol) to 2-deoxyecdysone                     |
| <b>Sad</b>                                      | PaOGS03950                             | Bger_09617                             | NP_650123    | Converts 2-deoxyecdysone to $\alpha$ -ecdysone (E)                               |
| <b>Shd</b>                                      | PaOGS36055<br>PaOGS08749               | Bger_13798                             | NP_996074    | Converts $\alpha$ -ecdysone (E) to 20-hydroxyecdysone (20E)                      |
| <b>CYP18A1</b>                                  | PaOGS25100<br>PaOGS28912<br>PaOGS03819 | Bger_09756<br>Bger_09764<br>Bger_09765 | NP_728191    | inactivates 20-hydroxyecdysone                                                   |

<sup>1</sup> Pame, *Periplaneta americana*, <sup>2</sup> Bger, *Blattella germanica*, <sup>3</sup> Dmel, *Drosophila melanogaster*.

**Supplementary Table 17** The gene list of JH pathway

|                                           | <b>Pame<sup>1</sup> ID</b>             | <b>Bger<sup>2</sup> ID</b> | <b>Dmel<sup>3</sup> ID</b> | <b>Supplementary notes or annotation</b>             |
|-------------------------------------------|----------------------------------------|----------------------------|----------------------------|------------------------------------------------------|
| <b>JH receptor</b>                        |                                        |                            |                            |                                                      |
| <b>Met</b>                                | ND                                     | ND                         | NP_511126                  |                                                      |
| <b>GCE</b>                                | PaOGS20531                             | ND                         | NP_001259564               | JH receptor                                          |
| <b>JH response gene</b>                   |                                        |                            |                            |                                                      |
| <b>Kr-h1</b>                              | PaOGS24593<br>PaOGS35342               | Bger_08591                 | NP_477466                  | JH primary response gene                             |
| <b>Hsp83</b>                              | PaOGS00318                             | Bger_03740<br>Bger_05508   | NP_523899                  | unfolded protein binding                             |
| <b>JH biosynthesis and biodegradation</b> |                                        |                            |                            |                                                      |
| <b>FAMeT</b>                              | PaOGS28839<br>PaOGS08986<br>PaOGS32140 | Bger_20349<br>Bger_20710   | NP_611544                  | Farnesoic acid O-methyl transferase                  |
| <b>JHEH</b>                               | PaOGS12138<br>PaOGS16223<br>PaOGS22049 | Bger_06817<br>Bger_06819   | NP_611385                  | juvenile hormone epoxide hydrolase                   |
| <b>HMGS</b>                               | PaOGS31743<br>PaOGS37360               | Bger_02739<br>Bger_03932   | NP_524711                  | HMG Coenzyme A synthase                              |
| <b>HMGR</b>                               | PaOGS01132                             | Bger_14007                 | NP_732900                  | hydroxymethylglutaryl-CoA reductase (NADPH) activity |

|             |              |            |            |                                                  |
|-------------|--------------|------------|------------|--------------------------------------------------|
|             | PaOGS15601   |            |            |                                                  |
| <b>IPP</b>  | PaOGS02335   | Bger_04718 | NP_731872  | iNDsitol-1,4-bisphosphate 1-phosphatase activity |
|             | PaOGS04500   | Bger_03482 |            |                                                  |
|             | PaOGS20547   | Bger_14147 |            |                                                  |
| <b>FPPS</b> | PaOGS04443   | Bger_01636 | NP_477380  | geranyltranstransferase activity                 |
|             | PaOGS04442   | Bger_01637 |            |                                                  |
|             | PaOGS18036   |            |            |                                                  |
|             | PaOGS03620   |            |            |                                                  |
|             | PaOGS03618   |            |            |                                                  |
|             | PaOGS03619   |            |            |                                                  |
|             | PaOGS10848   |            |            |                                                  |
|             | PaOGS16681   |            |            |                                                  |
|             | PaOGS03621   |            |            |                                                  |
|             | <b>JHAMT</b> | PaOGS26372 | Bger_04116 | NP_609793                                        |
| PaOGS26016  |              |            |            |                                                  |
| PaOGS20267  |              |            |            |                                                  |
| PaOGS26373  |              |            |            |                                                  |
| PaOGS35164  |              |            |            |                                                  |
| PaOGS20304  |              |            |            |                                                  |
| PaOGS23365  |              |            |            |                                                  |
| PaOGS06349  |              |            |            |                                                  |
| PaOGS12062  |              |            |            |                                                  |
| PaOGS23367  |              |            |            |                                                  |
| PaOGS27228  |              |            |            |                                                  |
| PaOGS23363  |              |            |            |                                                  |
| PaOGS23364  |              |            |            |                                                  |

|                   |                                                                                                                                          |                                                                                  |              |                                                   |
|-------------------|------------------------------------------------------------------------------------------------------------------------------------------|----------------------------------------------------------------------------------|--------------|---------------------------------------------------|
| <b>CYP15A1</b>    | PaOGS36907                                                                                                                               | Bger_09987                                                                       | AAN06321     | Methyl farnesoate epoxidase                       |
| <b>AACT</b>       | PaOGS05420<br>PaOGS21968<br>PaOGS24518<br>PaOGS26519                                                                                     | Bger_01766<br>Bger_10151                                                         | NP_572414    | acetyl-CoA C-acetyltransferase activity           |
| <b>mevK</b>       | PaOGS12817<br>PaOGS12818                                                                                                                 | Bger_05361                                                                       | NP_001027412 | mevalonate kinase activity                        |
| <b>pmevK</b>      | ND                                                                                                                                       | ND                                                                               | ND           |                                                   |
| <b>DPMD</b>       | ND                                                                                                                                       | ND                                                                               | ND           |                                                   |
| <b>IPPI</b>       | PaOGS20501                                                                                                                               | Bger_04562                                                                       | NP_650962    | isopentenyl-diphosphate delta-isomerase activity  |
| <b>FPPase</b>     | PaOGS20286<br>PaOGS33070<br>PaOGS34252                                                                                                   | Bger_04095<br>Bger_14027                                                         | NP_572760    | alkaline phosphatase activity                     |
| <b>Fod(ADH)</b>   | PaOGS02065<br>PaOGS06921<br>PaOGS10983<br>PaOGS10984<br>PaOGS15149<br>PaOGS17310<br>PaOGS23408<br>PaOGS28284<br>PaOGS28285<br>PaOGS28357 | Bger_05936<br>Bger_05937<br>Bger_05941<br>Bger_07328<br>Bger_07356<br>Bger_22502 | NP_001027266 | acetaldehyde dehydrogenase (acetylating) activity |
| <b>Fad (ALDH)</b> | PaOGS14229                                                                                                                               | Bger_00783                                                                       | NP_609285    | aldehyde dehydrogenase (NAD) activity             |



|             |            |            |           |                                                                         |
|-------------|------------|------------|-----------|-------------------------------------------------------------------------|
|             | PaOGS28787 | Bger_02689 |           |                                                                         |
|             | PaOGS18382 | Bger_03771 |           |                                                                         |
|             | PaOGS30290 | Bger_05316 |           |                                                                         |
|             | PaOGS10653 | Bger_13049 |           |                                                                         |
|             | PaOGS18875 | Bger_14856 |           |                                                                         |
|             |            | Bger_15688 |           |                                                                         |
|             |            | Bger_18207 |           |                                                                         |
| <b>JHE</b>  | PaOGS11091 | Bger_00414 | NP_523758 | carboxylic ester hydrolase activity; juvenile-hormone esterase activity |
|             | PaOGS16012 | Bger_10745 |           |                                                                         |
|             | PaOGS16015 | Bger_18826 |           |                                                                         |
|             | PaOGS16014 |            |           |                                                                         |
|             | PaOGS03076 |            |           |                                                                         |
| <b>JHDK</b> | PaOGS06270 | Bger_02790 | NP_524381 | sarcoplasmic calcium-binding protein 2                                  |

<sup>1</sup>Pame, *Periplaneta americana*, <sup>2</sup>Bger, *Blattella germanica*, <sup>3</sup>Dmel, *Drosophila melanogaster*.

**Supplementary Table 18** The gene list of insulin pathway

|                                                 | <b>Pame<sup>1</sup> ID</b> | <b>Bger<sup>2</sup> ID</b> | <b>Dmel<sup>3</sup> ID</b> | <b>Supplementary notes or annotation</b>          |
|-------------------------------------------------|----------------------------|----------------------------|----------------------------|---------------------------------------------------|
| <b>Ligands and secreted factors</b>             |                            |                            |                            |                                                   |
| convoluted                                      | PaOGS29089                 | Bger_24097                 | NP_610948                  | carboxypeptidase N regulatory subunit             |
|                                                 | PaOGS24452                 | Bger_15284                 |                            |                                                   |
|                                                 | PaOGS25673                 | Bger_19693                 |                            |                                                   |
| Ecdysone-inducible gene L2                      | ND                         | ND                         | NP_523921                  | insulin-related peptide binding protein           |
| Insulin-like peptide                            | PaOGS15477                 | Bger_24050                 | NP_648359                  | Insulin-like peptide 1                            |
|                                                 | PaOGS02783                 |                            | NP_524012                  | Insulin-like peptide 2                            |
|                                                 | PaOGS02784                 |                            | NP_648360                  | Insulin-like peptide 3                            |
|                                                 | PaOGS15476                 |                            | NP_648361                  | Insulin-like peptide 4                            |
|                                                 | PaOGS23100                 |                            | NP_996037                  | Insulin-like peptide 5                            |
|                                                 | PaOGS36319                 |                            | NP_570000                  | Insulin-like peptide 6                            |
|                                                 |                            |                            | NP_570070                  | Insulin-like peptide 7                            |
| Short neuropeptide-F                            | PaOGS17125                 | Bger_20322                 | NP_524176                  | short neuropeptide F receptor                     |
|                                                 | PaOGS09479                 | Bger_20131                 |                            |                                                   |
| IGF-II mRNA-binding protein                     | PaOGS03214                 | Bger_18295                 | NP_001285091               | Insulin-like growth factor 2 mRNA-binding protein |
| <b>Insulin-like receptor and its substrates</b> |                            |                            |                            |                                                   |
| chico                                           | PaOGS37252                 | Bger_01864                 | NP_723540                  | insulin receptor substrate-1                      |
|                                                 |                            | Bger_01863                 |                            |                                                   |

|                                    |            |            |              |                                       |
|------------------------------------|------------|------------|--------------|---------------------------------------|
| Insulin-like receptor              | PaOGS10688 | Bger_10316 | AAF55903     | insulin receptor                      |
|                                    | PaOGS25540 | Bger_13643 |              | similar to Insulin receptor precursor |
|                                    | PaOGS25539 | Bger_13644 |              |                                       |
|                                    | PaOGS31689 | Bger_14014 |              |                                       |
|                                    | PaOGS03239 |            |              |                                       |
|                                    | PaOGS36621 |            |              |                                       |
|                                    | PaOGS02593 |            |              | No significant similarity found       |
| Pi3K92E                            | PaOGS25629 | Bger_10044 | NP_650902    | Phosphatidylinositol 3 kinase 92E     |
| Pi3K21B                            | PaOGS11039 | Bger_15654 | NP_477270    | phosphatidylinositol 3-kinase 21B     |
|                                    | PaOGS26305 |            |              |                                       |
| Pi3K68D                            | PaOGS21297 | Bger_01070 | NP_001163420 | Phosphatidylinositol 3 kinase 68D     |
|                                    | PaOGS04183 |            |              |                                       |
|                                    | PaOGS04184 |            |              |                                       |
|                                    | PaOGS21298 |            |              |                                       |
| Pi3K59F                            | PaOGS06680 | Bger_06697 | NP_477133    | phosphatidylinositol 3 kinase 59F     |
| <b>Signal transduction pathway</b> |            |            |              |                                       |
| Akt1                               | PaOGS21842 | Bger_07332 | NP_732114    | serine/threonine protein kinase Akt   |
| focal adhesion kinase              | PaOGS08207 | Bger_02892 | NP_523793    | Focal adhesion kinase 1               |
| melted                             | PaOGS08596 | Bger_19955 | NP_001014572 | melted                                |
| nucleostemin 3                     | PaOGS36409 | Bger_02421 | NP_569915    | Large subunit GTPase 1-like protein   |
|                                    | PaOGS14310 |            |              |                                       |
| SCYLLA                             | PaOGS35498 | Bger_01043 | AAF59841     | similar to charybde                   |
| CHARYBDE                           | PaOGS35498 | Bger_01043 | AAF59840     | similar to charybde                   |
| target of rapamycin                | PaOGS00312 | Bger_07577 | NP_524891    | target of rapamycin isoform 1         |
|                                    | PaOGS16261 | Bger_27083 |              |                                       |
|                                    | PaOGS28942 |            |              |                                       |

|                           |                                        |                                                      |              |                                                               |
|---------------------------|----------------------------------------|------------------------------------------------------|--------------|---------------------------------------------------------------|
| Tsc1                      | PaOGS22671                             | Bger_08706                                           | NP_477415    | Tsc1                                                          |
| twins                     | PaOGS22334                             | Bger_15088                                           | NP_476880    | phosphatase pp2a or twins                                     |
| widerborst                | PaOGS24441                             | Bger_07755                                           | NP_733215    | similar to widerborst-PC                                      |
| PP2A-B'                   | PaOGS25786<br>PaOGS10864               | Bger_00705                                           | NP_001262695 | PP2A 56 kDa regulatory subunit delta isoform                  |
| Myc                       | PaOGS28552                             | Bger_11276                                           | NP_525062    | Myc protein                                                   |
| forkhead box, sub-group O | PaOGS31435                             | Bger_24290                                           | NP_996205    | similar to forkhead box subgroup O                            |
| gigas(TSC2)               | PaOGS25191                             | Bger_09893                                           | NP_524177    | similar to tuberous sclerosis 2                               |
| ribosomal protein S6      | PaOGS26661<br>PaOGS02013               | Bger_02990                                           | NP_727213    | ribosomal protein S6                                          |
| spargel                   | PaOGS23091                             | ND                                                   | NP_730835    | spargel                                                       |
| 4E-BP1 (thor)             | PaOGS17099                             | Bger_22986                                           | NP_477295    | eukaryotic translation initiation factor 4E-binding protein 1 |
| AMPKalpha                 | PaOGS22353                             | Bger_16490                                           | NP_477313    | 5'-AMP-activated protein kinase, catalytic alpha subunit      |
| AMPKbeta                  | PaOGS21039                             | Bger_07371                                           | NP_610460    | 5'-AMP-activated protein kinase, regulatory beta subunit      |
| AMPKgamma                 | PaOGS34091                             | Bger_18283                                           | NP_001163672 | 5'-AMP-activated protein kinase, regulatory gamma subunit     |
| CAP                       | PaOGS35184<br>PaOGS35183<br>PaOGS10470 | Bger_04936<br>Bger_04937<br>Bger_00872<br>Bger_04938 | NP_001246239 | sorbin and SH3 domain-containing protein 1                    |
| caravaggio                | ND                                     | ND                                                   | NP_524477    | Mitochondrial 28S ribosomal protein S31                       |
| Cbl                       | PaOGS25958                             | Bger_02640<br>Bger_02641                             | CAA11149     | E3 ubiquitin-protein ligase CBL                               |
| nejire                    | PaOGS25711<br>PaOGS23031<br>PaOGS35225 | Bger_12712<br>Bger_12714<br>Bger_12715               | NP_001188575 | E1A/CREB-binding protein                                      |

|                   |                                                                                                                                                                      |                                                                                                                            |              |                                                            |
|-------------------|----------------------------------------------------------------------------------------------------------------------------------------------------------------------|----------------------------------------------------------------------------------------------------------------------------|--------------|------------------------------------------------------------|
|                   |                                                                                                                                                                      | Bger_22304                                                                                                                 |              |                                                            |
| Cip4              | PaOGS19358<br>PaOGS19357                                                                                                                                             | Bger_13506                                                                                                                 | NP_647893    | Cdc42-interacting protein 4                                |
| Raf               | PaOGS36071                                                                                                                                                           | Bger_28322                                                                                                                 | NP_525047    | Raf-like protein serine/threonine-protein kinase phl       |
| Crk               | PaOGS30787                                                                                                                                                           | Bger_09259                                                                                                                 | NP_726549    | proto-oncogene C-crk                                       |
| Ehbp1             | PaOGS20136                                                                                                                                                           | Bger_14504                                                                                                                 | NP_611179    | Eps15 homology domain containing protein-binding protein 1 |
| ecdysone receptor | PaOGS33228                                                                                                                                                           | Bger_08790                                                                                                                 | NP_001163061 | Ecdysone receptor                                          |
| Past1             | PaOGS16748<br>PaOGS22627<br>PaOGS03852                                                                                                                               | Bger_15881<br>Bger_22702                                                                                                   | NP_524332    | Putative Achaete Scute Target 1                            |
| eIF-4E            | PaOGS28859<br>PaOGS29690<br>PaOGS15419                                                                                                                               | Bger_00848<br>Bger_00898<br>Bger_07664                                                                                     | NP_729485    | translation initiation factor 4E                           |
| ppk               | PaOGS00759<br>PaOGS08174<br>PaOGS09663<br>PaOGS09884<br>PaOGS10495<br>PaOGS12339<br>PaOGS15212<br>PaOGS15950<br>PaOGS18067<br>PaOGS20205<br>PaOGS25907<br>PaOGS26103 | Bger_00502<br>Bger_00506<br>Bger_00509<br>Bger_01660<br>Bger_03023<br>Bger_05822<br>Bger_07055<br>Bger_16722<br>Bger_18015 | NP_477232    | Sodium channel protein Nach OS                             |

|                          |            |            |              |                                                                          |
|--------------------------|------------|------------|--------------|--------------------------------------------------------------------------|
|                          | PaOGS28784 |            |              |                                                                          |
|                          | PaOGS29037 |            |              |                                                                          |
|                          | PaOGS30636 |            |              |                                                                          |
|                          | PaOGS31329 |            |              |                                                                          |
|                          | PaOGS33388 |            |              |                                                                          |
|                          | PaOGS33919 |            |              |                                                                          |
|                          | PaOGS34603 |            |              |                                                                          |
|                          | PaOGS34638 |            |              |                                                                          |
|                          | PaOGS36017 |            |              |                                                                          |
| Erk(rolled)              | PaOGS23998 | Bger_07900 | NP_001287635 | Mitogen-activated protein kinase                                         |
|                          | PaOGS05015 |            |              |                                                                          |
| flotillin 1              | PaOGS15301 | Bger_07684 | NP_725476    | Flotillin-1                                                              |
|                          | PaOGS36285 |            |              |                                                                          |
| Glut4EF                  | PaOGS34976 | Bger_11307 | ABY40732     | Glucose transporter 4 enhancer factor                                    |
| pico                     | PaOGS35141 | Bger_10233 | NP_608363    | Ras-associated and pleckstrin-like proteiny domains-containing protein 1 |
| drk                      | PaOGS19560 | Bger_03191 | NP_725306    | downstream of receptor kinase                                            |
| GS                       | PaOGS16444 | Bger_09447 | NP_001162783 | Glutathione Synthetase                                                   |
|                          | PaOGS01368 |            |              |                                                                          |
| shaggy                   | PaOGS21420 | Bger_15050 | NP_001259193 | glycogen synthase kinase-3                                               |
|                          |            | Bger_15051 |              |                                                                          |
| Hormone-sensitive lipase | PaOGS13893 | ND         | NP_725942    | Hormone-sensitive lipase is involved in lipid storage                    |
| I-kappaB kinase epsilon  | PaOGS03122 | Bger_23021 | NP_610048    | Serine/threonine-protein kinase TBK1                                     |

|                                                     |            |            |              |                                                          |
|-----------------------------------------------------|------------|------------|--------------|----------------------------------------------------------|
| inos                                                | PaOGS04139 | Bger_04317 | NP_477405    | Inositol-3-phosphate synthase 1-B                        |
| basket                                              | PaOGS14087 | Bger_26268 | NP_001162932 | Stress-activated protein kinase JNK                      |
| Lkb1 kinase                                         | PaOGS07226 | Bger_01519 | NP_001163606 | serine/threonine-protein kinase 11                       |
| Dsor1                                               | PaOGS14031 | Bger_23552 | BAA02925     | dual specificity mitogen-activated protein kinase dSOR1  |
| dreadlocks                                          | PaOGS03985 | Bger_16202 | NP_001259845 | cytoplasmic protein NCK1                                 |
|                                                     | PaOGS21016 | Bger_27896 |              |                                                          |
| phosphatase and tensin homolog                      | PaOGS02078 | Bger_02874 | NP_599147    | phosphatase and tensin-like                              |
|                                                     | PaOGS21433 | Bger_19611 |              |                                                          |
| Phosphoinositide-dependent kinase 1                 | PaOGS02814 | Bger_19061 | NP_001261183 | 3-phosphoinositide-dependent protein kinase 1 isoform X1 |
| RPS6-p70-protein kinase                             | PaOGS28537 | Bger_22784 | NP_523941    | ribosomal protein S6 kinase                              |
|                                                     | PaOGS34494 | Bger_22785 |              |                                                          |
|                                                     | PaOGS32255 | Bger_27047 |              |                                                          |
|                                                     |            | Bger_27124 |              |                                                          |
|                                                     |            | Bger_23850 |              |                                                          |
|                                                     |            | Bger_25546 |              |                                                          |
| protein kinase, cAMP-dependent, catalytic subunit 1 | PaOGS33117 | Bger_01349 | NP_995672    | protein kinase A                                         |
| inactivation no afterpotential C                    | PaOGS08405 | Bger_00689 | NP_476863    | PKC (protein kinase C)                                   |
|                                                     | PaOGS02145 | Bger_16364 |              |                                                          |
|                                                     | PaOGS04744 | Bger_20742 |              |                                                          |
|                                                     | PaOGS13125 | Bger_27207 |              |                                                          |
| protein phosphatase 1alpha at 96A                   | PaOGS07811 | Bger_01574 | NP_001262919 | protein phosphatase 1, catalytic subunit                 |
|                                                     | PaOGS01282 |            |              |                                                          |
|                                                     | PaOGS26177 |            |              |                                                          |

|                                   |                                        |                          |              |                                                          |
|-----------------------------------|----------------------------------------|--------------------------|--------------|----------------------------------------------------------|
|                                   | PaOGS11408                             |                          |              |                                                          |
| microtubule star                  | PaOGS27589                             | Bger_23717<br>Bger_25259 | NP_001285725 | protein phosphatase 2 (formerly 2A), catalytic subunit   |
| protein phosphatase V             | PaOGS31508                             | Bger_18449               | NP_001259274 | serine/threonine-protein phosphatase 6 catalytic subunit |
| Proline-rich Akt substrate 40 kDa | ND                                     | ND                       | NP_001303349 |                                                          |
| protein tyrosine phosphatase 61F  | PaOGS11757                             | Bger_26148               | NP_001261253 | protein tyrosine phosphatase, non-receptor type 1        |
| Rac1                              | PaOGS23910                             | Bger_09087               | NP_476950    | Ras-related C3 botulinum toxin substrate 1               |
| Ras 85D                           | PaOGS07457                             | Bger_01384               | NP_476699    | Ras-like protein                                         |
|                                   | PaOGS02503                             | Bger_06705               |              |                                                          |
| Ras 64B                           | PaOGS15449                             | Bger_00921               | NP_523917    | Ras-related protein R-Ras2                               |
|                                   | PaOGS04602                             | Bger_27659<br>Bger_14904 |              |                                                          |
| Rheb                              | PaOGS37079<br>PaOGS01402<br>PaOGS01401 | Bger_14087               | NP_730951    | Ras homolog enriched in brain                            |
| triose phosphate isomerase        | PaOGS10090<br>PaOGS32192<br>PaOGS35207 | Bger_11437               | NP_788764    | triosephosphate isomerase                                |
| SHC-adaptor protein               | PaOGS31868                             | Bger_09874               | NP_524683    | src homology 2 domain-containing transforming protein C  |
| corkscrew                         | PaOGS29953<br>PaOGS02284<br>PaOGS29346 | Bger_09096               | NP_001259174 | protein tyrosine phosphatase, non-receptor type 11       |
| Salt-inducible kinase 2           | PaOGS27630                             | Bger_16996<br>Bger_19023 | NP_569972    | serine/threonine-protein kinase NIM1, putative           |
| SAPK-interacting protein 1        | PaOGS13689                             | Bger_14252               | NP_610963    | Stress-activated map kinase-interacting protein 1        |
| Son of sevenless                  | PaOGS26097                             | Bger_12100               | NP_476597    | as GTP exchange factor, son of sevenless, putative       |



|                                           |            |            |              |                                                          |
|-------------------------------------------|------------|------------|--------------|----------------------------------------------------------|
|                                           | PaOGS37301 | Bger_16633 |              | Ras-specific guanine nucleotide-releasing factor 2       |
|                                           | PaOGS05185 |            |              |                                                          |
| sterol regulatory element binding protein | PaOGS15611 | Bger_16229 | NP_524166    | sterol regulatory element-binding transcription factor 1 |
| pollux                                    | PaOGS20378 | ND         | NP_001163511 | TBC1 domain family member 4 isoform X2                   |
|                                           | PaOGS01110 |            |              | TBC1 domain family member 1 isoform X3                   |
| C3G guanyl-nucleotide exchange factor     | PaOGS31746 | Bger_03933 | NP_001259293 | Rap guanine nucleotide exchange factor (GEF) 1           |
|                                           | PaOGS01706 |            |              |                                                          |
| Usf                                       | PaOGS13899 | Bger_18713 | NP_726931    | Upstream stimulatory factor, putative                    |
| USP                                       | PaOGS21233 | Bger_15477 | NP_476781    | ultraspiracle                                            |
|                                           | PaOGS36136 |            |              |                                                          |

<sup>1</sup>Pame, *Periplaneta americana*, <sup>2</sup>Bger, *Blattella germanica*, <sup>3</sup>Dmel, *Drosophila melanogaster*. \* = potential fragments of one gene, respectively

**Supplementary Table 19** The gene list of Chitin metabolism pathway

|                                                  | <b>Pame<sup>1</sup> ID</b> | <b>Bger<sup>2</sup> ID</b> | <b>Dmel<sup>3</sup> ID</b> | <b>Supplementary notes or annotation</b>              |
|--------------------------------------------------|----------------------------|----------------------------|----------------------------|-------------------------------------------------------|
| <b>Chitin syntheses</b>                          |                            |                            |                            |                                                       |
| Trehalase                                        | PaOGS34620                 | Bger_07250                 | CG9364                     | Trehalase                                             |
|                                                  | PaOGS36391                 | Bger_24156                 |                            |                                                       |
|                                                  | PaOGS13872*                | Bger_01391                 |                            |                                                       |
|                                                  | PaOGS20505*                | Bger_14170                 |                            |                                                       |
|                                                  | PaOGS16530                 |                            |                            |                                                       |
|                                                  | PaOGS02695                 |                            |                            |                                                       |
| Hexokinase A                                     | PaOGS11144                 | Bger_12151                 | CG3001                     | Hexokinase A                                          |
|                                                  | PaOGS27280                 | Bger_17436                 |                            |                                                       |
|                                                  | PaOGS08108                 | Bger_18479                 |                            |                                                       |
| Glucose-6-phosphate isomerase                    | PaOGS21361                 | Bger_06841                 | CG8251                     | Pgi Phosphoglucose isomerase                          |
| Glutamine: fructose-6-phosphate aminotransferase | PaOGS37424                 | Bger_14767                 | CG12449                    | GFAT1                                                 |
|                                                  | PaOGS32027                 |                            | CG1345                     | GFAT2                                                 |
|                                                  | PaOGS23873                 |                            |                            |                                                       |
| Glucosamine-6-phosphate N-acetyltransferase      | PaOGS04499                 | Bger_03483                 | CG1969                     | GNA                                                   |
| Phosphoacetylglucosamine mutase                  | PaOGS06368                 | Bger_06051                 | CG10627                    | Nesthocker, nst,<br>(Phosphoacetylglucosamine mutase) |
| UDP-N-acetylglucosamine                          | ND                         | Bger_20395                 | CG9535                     | mummy                                                 |

|                                |             |            |         |                                             |
|--------------------------------|-------------|------------|---------|---------------------------------------------|
| pyrophosphorylase              |             |            |         | UDP-N-acetylglucosamine pyrophosphorylase   |
| Chitin synthase 1              | PaOGS16634  | Bger_05690 | CG2666  | krotzkopf verkehrt, kkv (Chitin synthase 1) |
|                                |             | Bger_05692 |         | KKV                                         |
| Chitin synthase 2              | PaOGS16634  | Bger_05690 | CG7464  | Chitin synthase 2 (CHS2)                    |
|                                |             | Bger_05692 |         | CHS2                                        |
| <b>Chitin degradation</b>      |             |            |         |                                             |
| Imaginal disc growth factor    | PaOGS29955  | Bger_26630 | CG4472  | IDGF1                                       |
|                                |             |            | CG4475  | IDGF2                                       |
|                                |             |            | CG4559  | IDGF3                                       |
|                                |             |            | CG1780  | IDGF4                                       |
|                                |             |            | CG5154  | IDGF5                                       |
| Chitinase 1                    | PaOGS30173  | Bger_10354 | CG8460  | Chitinase 1                                 |
| Chitinase 2                    | PaOGS14170  | Bger_13389 | CG2054  | Chitinase 2                                 |
| Chitinase 3                    | PaOGS33360  | Bger_14104 | ND      | Chitinase 3                                 |
| Chitinase 5                    | PaOGS07061* | Bger_02854 | CG9307  | Chitinase 5                                 |
|                                | PaOGS07062* | Bger_02855 |         |                                             |
|                                | PaOGS07060  | Bger_02856 |         |                                             |
|                                | PaOGS32991  |            |         |                                             |
| Chitinase 6                    | PaOGS13150  | Bger_16010 | CG43374 | Chitinase 6                                 |
| Chitinase 7                    | PaOGS17511  | Bger_26494 | CG1869  | Chitinase 7                                 |
| Chitinase 10                   | PaOGS37217  | Bger_01400 | CG18140 | Chitinase 10                                |
| Chitinase 11                   | PaOGS19890  | Bger_12136 | CG3044  | Chitinase 11                                |
| Chitinase 8 (other chitinases) | PaOGS02617  | Bger_08812 | CG9357  | Chitinase 8                                 |
|                                | PaOGS25829  | Bger_01401 | CG3986  | Chitinase 4                                 |
|                                | PaOGS04885  | Bger_01402 | CG10531 | Chitinase 9                                 |
|                                | PaOGS25832  | Bger_14524 | CG30293 | Chitinase 12                                |

PaOGS34878

PaOGS25831

PaOGS09724

PaOGS25833

PaOGS04059

<sup>1</sup>Pame = *Periplaneta americana*, <sup>2</sup>Bger = *Blattella germanica*, <sup>3</sup>Dmel = *Drosophila melanogaster*. \* = potential fragments of one gene, respectively

**Supplementary Table 20** The gene list of AMPK pathway

|                                               | Pame <sup>1</sup> ID     | Bger <sup>2</sup> ID | Dmel <sup>3</sup> ID | Supplementary notes or annotation                             |
|-----------------------------------------------|--------------------------|----------------------|----------------------|---------------------------------------------------------------|
| <b>Subunits</b>                               |                          |                      |                      |                                                               |
| AMPKalpha                                     | PaOGS22353               | Bger_16490           | NP_477313            | 5'-AMP-activated protein kinase, catalytic alpha subunit      |
| AMPKbeta                                      | PaOGS21039               | Bger_07371           | NP_610460            | 5'-AMP-activated protein kinase, regulatory beta subunit      |
| AMPKgama                                      | PaOGS34091               | Bger_18283           | NP_001163672         | 5'-AMP-activated protein kinase, regulatory gamma subunit     |
| <b>Signal transduction pathway</b>            |                          |                      |                      |                                                               |
| 4E-BP1 (thor)                                 | PaOGS17099               | Bger_22986           | NP_477295            | eukaryotic translation initiation factor 4E-binding protein 1 |
| Acetyl-CoA carboxylase                        | PaOGS02215               | Bger_06031           | NP_610342            | acetyl-CoA carboxylase / biotin carboxylase                   |
| Akt1                                          | PaOGS21842               | Bger_07332           | NP_732114            | serine/threonine protein kinase Akt                           |
| Autophagy-related 1                           | PaOGS18161<br>PaOGS07965 | Bger_10975           | NP_001163433         | Serine/threonine-protein kinase                               |
| Autophagy-related 13                          | PaOGS17978               | Bger_11856           | NP_649796            | autophagy-related protein 13                                  |
| Autophagy-related 17                          | PaOGS08238               | Bger_00056           | NP_649573            | Autophagy-related 17                                          |
| brummer                                       | PaOGS34957               | Bger_05619           | NP_001163445         | patatin-like phospholipase domain-containing protein 3        |
| cytoplasmic linker protein 190                | PaOGS02216               | Bger_19402           | NP_001137834         | CAP-Gly domain-containing linker protein 1                    |
| Cyclic-AMP response element binding protein B | PaOGS09279               | Bger_06395           | NP_001334685         | cAMP-responsive element modulator isoform X4                  |
| Erk(rolled)                                   | PaOGS23998<br>PaOGS05015 | Bger_07900           | NP_001287635         | Mitogen-activated protein kinase                              |

|                             |            |            |              |                                                          |
|-----------------------------|------------|------------|--------------|----------------------------------------------------------|
| forkhead box, sub-group O   | PaOGS31435 | Bger_24290 | NP_996205    | similar to forkhead box subgroup O                       |
| GS                          | PaOGS16444 | Bger_09447 | NP_001162783 | Glutathione Synthetase                                   |
|                             | PaOGS01368 |            |              | Glutathione Synthetase                                   |
| G protein alpha q subunit   | PaOGS27751 | Bger_17163 | NP_725192    | guanine nucleotide binding protein (G protein), alpha 14 |
|                             | PaOGS24883 | Bger_17164 |              |                                                          |
|                             | PaOGS06393 | Bger_17165 |              |                                                          |
| histone deacetylase 4       | PaOGS25592 | Bger_13509 | NP_001259507 | histone deacetylase 4                                    |
| HMG coenzyme A reductase    | PaOGS01132 | Bger_14007 | NP_732900    | 3-hydroxy-3-methylglutaryl-coenzyme A reductase          |
|                             | PaOGS15601 |            |              |                                                          |
| hepatocyte nuclear factor 4 | PaOGS26261 | Bger_07640 | NP_723413    | Transcription factor HNF-4-like protein                  |
| Insulin-like receptor       | PaOGS10688 | Bger_14014 | AAF55903     | insulin receptor                                         |
|                             | PaOGS25540 | Bger_10316 |              | similar to Insulin receptor precursor                    |
|                             | PaOGS25539 | Bger_13643 |              |                                                          |
|                             | PaOGS31689 | Bger_13644 |              |                                                          |
|                             | PaOGS36621 |            |              |                                                          |
|                             | PaOGS03239 |            |              |                                                          |
|                             | PaOGS02593 |            |              |                                                          |
| Lkb1 kinase                 | PaOGS07226 | Bger_01519 | NP_001163606 | serine/threonine-protein kinase 11                       |
| target of rapamycin         | PaOGS00312 | Bger_07577 | NP_524891    | target of rapamycin isoform 1                            |
|                             | PaOGS28942 | Bger_27083 |              |                                                          |
|                             | PaOGS16261 |            |              |                                                          |
| Tsc1                        | PaOGS22671 | Bger_08706 | NP_477415    | Tsc1                                                     |
| nejire                      | PaOGS25711 | Bger_12712 | NP_001188575 | E1A/CREB-binding protein                                 |
|                             | PaOGS23031 | Bger_12714 |              |                                                          |
|                             | PaOGS35225 | Bger_12715 |              |                                                          |
|                             |            | Bger_22304 |              |                                                          |

|                                                        |                                                      |                                        |              |                                                      |
|--------------------------------------------------------|------------------------------------------------------|----------------------------------------|--------------|------------------------------------------------------|
| spargel                                                | PaOGS23091                                           | ND                                     | NP_730835    | PGC1                                                 |
| Pi3K92E                                                | PaOGS25629                                           | Bger_10044                             | NP_650902    | Phosphatidylinositol 3 kinase 92E                    |
| Pi3K21B                                                | PaOGS11039<br>PaOGS26305                             | Bger_15545                             | NP_477270    | phosphatidylinositol 3-kinase 21B                    |
| Pi3K68D                                                | PaOGS21297<br>PaOGS04183<br>PaOGS04184<br>PaOGS21298 | Bger_01070                             | NP_001163420 | Phosphatidylinositol 3 kinase 68D                    |
| Pi3K59F                                                | PaOGS06680                                           | Bger_06697                             | NP_477133    | phosphatidylinositol 3 kinase 59F                    |
| protein kinase, cAMP-dependent,<br>catalytic subunit 1 | PaOGS33117                                           | Bger_01349                             | NP_995672    | protein kinase A                                     |
| no receptor potential A                                | PaOGS12297<br>PaOGS02494<br>PaOGS02706               | Bger_18892                             | NP_001284860 | phospholipase C, beta                                |
| Raf                                                    | PaOGS36071                                           | Bger_28322                             | NP_525047    | Raf-like protein serine/threonine-protein kinase phl |
| Ras 85D                                                | PaOGS07457<br>PaOGS02503                             | Bger_01384<br>Bger_06705               | NP_476699    | Ras-like protein                                     |
| Ras 64B                                                | PaOGS15449<br>PaOGS04602                             | Bger_00921<br>Bger_27659<br>Bger_14904 | NP_523917    | Ras-related protein R-Ras2                           |
| Rheb                                                   | PaOGS37079<br>PaOGS01402<br>PaOGS01401               | Bger_14087                             | NP_730951    | Ras homolog enriched in brain                        |
| RPS6-p70-protein kinase                                | PaOGS28537<br>PaOGS34494<br>PaOGS32255               | Bger_22784<br>Bger_22785<br>Bger_27047 | NP_523941    | ribosomal protein S6 kinase                          |

|                                           |                          |                          |              |                                                                                                                            |
|-------------------------------------------|--------------------------|--------------------------|--------------|----------------------------------------------------------------------------------------------------------------------------|
|                                           |                          | Bger_27124               |              |                                                                                                                            |
|                                           |                          | Bger_25546               |              |                                                                                                                            |
|                                           |                          | Bger_23850               |              |                                                                                                                            |
| sirtuin 1                                 | PaOGS18856               | Bger_01051<br>Bger_06322 | NP_477351    | NAD-dependent deacetylase sirtuin 1                                                                                        |
| sterol regulatory element binding protein | PaOGS15611               | Bger_16229               | NP_524166    | sterol regulatory element-binding transcription factor 1                                                                   |
| Ste20-like kinase                         | PaOGS15586               | Bger_12288               | NP_001246138 | STE20-related kinase adapter protein alpha                                                                                 |
| tau                                       | PaOGS04194               | Bger_00115               | NP_001303549 | microtubule-associated protein tau                                                                                         |
| pollux                                    | PaOGS20378<br>PaOGS01110 | ND                       | NP_001163511 | TBC1 domain family member 4 isoform X2<br>TBC1 domain family member 1 isoform X3<br>TBC1 domain family member 1 isoform X2 |
| microtubule star                          | PaOGS27589               | Bger_23717<br>Bger_25259 | NP_001285725 | protein phosphatase 2 (formerly 2A), catalytic subunit                                                                     |
| twins                                     | PaOGS22334               | Bger_15088               | NP_476880    | phosphatase pp2a or twins                                                                                                  |
| widerborst                                | PaOGS24441               | Bger_07755               | NP_733215    | similar to widerborst-PC                                                                                                   |
| PP2A-B'                                   | PaOGS25786<br>PaOGS10864 | Bger_00705               | NP_001262695 | PP2A 56 kDa regulatory subunit delta isoform                                                                               |
| protein phosphatase V                     | PaOGS31508               | Bger_18449               | NP_001259274 | serine/threonine-protein phosphatase 6 catalytic subunit                                                                   |
| ecdysone receptor                         | PaOGS33228               | Bger_08790               | NP_001163061 | Ecdysone receptor                                                                                                          |
| USP                                       | PaOGS21233<br>PaOGS36136 | Bger_15477               | NP_476781    | ultraspiracle                                                                                                              |
| withered                                  | PaOGS29230               | Bger_16466<br>Bger_16467 | NP_001163112 | carnitine O1mitoyltransferase 1                                                                                            |

<sup>1</sup> Pame, *Periplaneta americana*, <sup>2</sup> Bger, *Blattella germanica*, <sup>3</sup> Dmel, *Drosophila melanogaster*. \* = potential fragments of one gene, respectively.



**Supplementary Table 21** The gene list of TOR pathway

|                                        | <b>Pame<sup>1</sup> ID</b>             | <b>Bger<sup>2</sup> ID</b> | <b>Dmel<sup>3</sup> ID</b> | <b>Supplementary notes or annotation</b>                                       |
|----------------------------------------|----------------------------------------|----------------------------|----------------------------|--------------------------------------------------------------------------------|
| <b>Components of dTOR</b>              |                                        |                            |                            |                                                                                |
| raptor                                 | PaOGS18513<br>PaOGS25190               | Bger_12090                 | NP_001284924               | egulatory associated protein of dTOR                                           |
| rapamycin-insensitive companion of Tor | PaOGS05394                             | Bger_07681<br>Bger_07682   | NP_573371                  | rapamycin-insensitive companion of dTOR                                        |
| Lst8                                   | PaOGS21452<br>PaOGS17698               | Bger_13789                 | NP_572572                  | Target of rapamycin complex subunit lst8                                       |
| Proline-rich Akt substrate 40 kDa      | PaOGS20714                             | Bger_01850                 | NP_001303349               | Proline-rich Akt substrate 40 kDa(Lobe)                                        |
| target of rapamycin                    | PaOGS00312<br>PaOGS28942<br>PaOGS16261 | Bger_07577<br>Bger_27083   | NP_524891                  | target of rapamycin isoform 1                                                  |
| <b>Signal transduction pathway</b>     |                                        |                            |                            |                                                                                |
| 4E-BP1                                 | PaOGS17099                             | Bger_22986                 | NP_477295                  | Also named thor, eukaryotic translation initiation factor 4E-binding protein 1 |
| AMPKalpha                              | PaOGS22353                             | Bger_16490                 | NP_477313                  | 5'-AMP-activated protein kinase, catalytic alpha subunit                       |
| AMPKbeta                               | PaOGS21039                             | Bger_07371                 | NP_610460                  | 5'-AMP-activated protein kinase, regulatory beta subunit                       |
| AMPKgama                               | PaOGS34091                             | Bger_18283                 | NP_001163672               | 5'-AMP-activated protein kinase, regulatory gamma subunit                      |
| Akt1                                   | PaOGS21842                             | Bger_07332                 | NP_732114                  | serine/threonine protein kinase Akt                                            |
| dishevelled                            | PaOGS28148                             | Bger_04903                 | NP_511118                  | Segment polarity protein dishevelled-like protein                              |

|                                     |                                        |                                                                                  |              | DVL-3                                                                    |
|-------------------------------------|----------------------------------------|----------------------------------------------------------------------------------|--------------|--------------------------------------------------------------------------|
| eIF-4E                              | PaOGS28859<br>PaOGS29690<br>PaOGS15419 | Bger_00848<br>Bger_07664<br>Bger_00898                                           | NP_729485    | translation initiation factor 4E                                         |
| Erk(rolled)                         | PaOGS23998<br>PaOGS05015               | Bger_07900                                                                       | NP_001287635 | Mitogen-activated protein kinase                                         |
| FK506-binding protein 2             | ND                                     | Bger_13733                                                                       | NP_523792    | 12 kDa FK506-binding protein                                             |
| pico                                | PaOGS35141                             | Bger_10233                                                                       | NP_608363    | Ras-associated and pleckstrin-like proteiny domains-containing protein 1 |
| shaggy                              | PaOGS21420                             | Bger_15050<br>Bger_15051                                                         | NP_001259193 | glycogen synthase kinase-3                                               |
| tango                               | PaOGS14643                             | Bger_24892                                                                       | NP_731308    | hypoxia-inducible factor 1 beta                                          |
| chico                               | PaOGS37252                             | Bger_01864                                                                       | NP_723540    | insulin receptor substrate-1                                             |
| Lkb1 kinase                         | PaOGS07226                             | Bger_01519                                                                       | NP_001163606 | serine/threonine-protein kinase 11                                       |
| Myc                                 | PaOGS28552                             | Bger_11276                                                                       | NP_525062    | Myc protein                                                              |
| RPS6-p70-protein kinase             | PaOGS28537<br>PaOGS34494<br>PaOGS32255 | Bger_22784<br>Bger_22785<br>Bger_27047<br>Bger_27124<br>Bger_23850<br>Bger_25546 | NP_523941    | ribosomal protein S6 kinase                                              |
| Phosphoinositide-dependent kinase 1 | PaOGS02814                             | Bger_19061                                                                       | NP_001261183 | 3-phosphoinositide-dependent protein kinase 1 isoform X1                 |
| Insulin-like receptor               | PaOGS10688<br>PaOGS25540<br>PaOGS25539 | Bger_10316<br>Bger_13643<br>Bger_13644                                           | AAF55903     | insulin receptor<br>similar to Insulin receptor precursor                |

|                                       |                                                      |                                                      |              |                                     |
|---------------------------------------|------------------------------------------------------|------------------------------------------------------|--------------|-------------------------------------|
|                                       | PaOGS31689<br>PaOGS36621<br>PaOGS03239<br>PaOGS02593 | Bger_14014                                           |              |                                     |
| Pi3K92E                               | PaOGS25629                                           | Bger_10044                                           | NP_650902    | Phosphatidylinositol 3 kinase 92E   |
| Pi3K21B                               | PaOGS11039<br>PaOGS26305                             | Bger_15545                                           | NP_477270    | phosphatidylinositol 3-kinase 21B   |
| Pi3K68D                               | PaOGS21297<br>PaOGS04183<br>PaOGS04184<br>PaOGS21298 | Bger_01070                                           | NP_001163420 | Phosphatidylinositol 3 kinase 68D   |
| Pi3K59F                               | PaOGS06680                                           | Bger_06697                                           | NP_477133    | phosphatidylinositol 3 kinase 59F   |
| inactivation no afterpotential C(PKC) | PaOGS08405<br>PaOGS02145<br>PaOGS04744<br>PaOGS13125 | Bger_00689<br>Bger_16364<br>Bger_20742<br>Bger_27207 | NP_476863    | protein kinase C                    |
| Ultraspiracle ( USP )                 | PaOGS21233<br>PaOGS36136                             | Bger_15477                                           | NP_476781    | ultraspiracle                       |
| Proline-rich Akt substrate 40 kDa     | ND                                                   | ND                                                   | NP_001303349 |                                     |
| phosphatase and tensin homolog        | PaOGS02078<br>PaOGS21433                             | Bger_19611<br>Bger_02874                             | NP_599147    | phosphatase and tensin-like (PTEN)  |
| Ras-related GTP binding A/B           | PaOGS25148                                           | Bger_02131                                           | NP_649850    | ras-related GTP-binding protein A/B |
| Ras-related GTP binding C/D           | PaOGS00446                                           | Bger_03026                                           | NP_610361    | ras-related GTP-binding protein C/D |
| Ras 85D                               | PaOGS07457<br>PaOGS02503                             | Bger_01384<br>Bger_06705                             | NP_476699    | Ras-like protein                    |

|                                           |                                        |                                        |              |                                                          |
|-------------------------------------------|----------------------------------------|----------------------------------------|--------------|----------------------------------------------------------|
| Ras 64B                                   | PaOGS15449<br>PaOGS04602               | Bger_00921<br>Bger_14904<br>Bger_27659 | NP_523917    | Ras-related protein R-Ras2                               |
| death related ced-3/Nedd2-like caspase    | PaOGS31167                             | Bger_14092                             | NP_477249    | caspase 8                                                |
| Rheb                                      | PaOGS37079<br>PaOGS01402<br>PaOGS01401 | Bger_14087                             | NP_730951    | Ras homolog enriched in brain                            |
| SAPK-interacting protein 1                | PaOGS13689                             | Bger_14252                             | NP_610963    | target of rapamycin complex 2 subunit                    |
| sterol regulatory element binding protein | PaOGS15611                             | Bger_16229                             | NP_524166    | sterol regulatory element-binding transcription factor 1 |
| Tsc1                                      | PaOGS22671                             | Bger_08706                             | NP_477415    | Tsc1                                                     |
| Mitf                                      | PaOGS06603<br>PaOGS20366               | Bger_03864                             | NP_001245436 | microphthalmia-associated transcription factor           |
| melted                                    | PaOGS08596                             | Bger_19955                             | NP_001014572 | melted                                                   |
| forkhead box, sub-group O                 | PaOGS31435                             | Bger_24290                             | NP_996205    | similar to forkhead box subgroup O                       |
| ecdysone receptor                         | PaOGS33228                             | Bger_08790                             | NP_001163061 | Ecdysone receptor                                        |
| SCYLLA                                    | PaOGS35498                             | Bger_01043                             | AAF59841     | similar to charybde                                      |
| CHARYBDE                                  | PaOGS35498                             | Bger_01043                             | AAF59840     | similar to charybde                                      |
| microtubule star                          | PaOGS27589                             | Bger_23717<br>Bger_25259               | NP_001285725 | protein phosphatase 2 (formerly 2A), catalytic subunit   |
| twins                                     | PaOGS22334                             | Bger_15088                             | NP_476880    | phosphatase pp2a or twins                                |
| widerborst                                | PaOGS24441                             | Bger_07755                             | NP_733215    | similar to widerborst-PC                                 |
| PP2A-B'                                   | PaOGS25786<br>PaOGS10864               | Bger_00705                             | NP_001262695 | PP2A 56 kDa regulatory subunit delta isoform             |
| protein phosphatase V                     | PaOGS31508                             | Bger_18449                             | NP_001259274 | serine/threonine-protein phosphatase 6 catalytic subunit |

<sup>1</sup>Pame, *Periplaneta americana*, <sup>2</sup>Bger, *Blattella germanica*, <sup>3</sup>Dmel, *Drosophila melanogaster*. \* = potential fragments of one gene

**Supplementary Table 22** Statistics of cuticle protein genes in *P. Americana* and related species

|                        | RR-1 | RR-2 | RR-3 | CPAPs | CPF/CPFL | TWEEDLE | Others | Totals |
|------------------------|------|------|------|-------|----------|---------|--------|--------|
| <i>P. americana</i>    | 30   | 165  | 18   | 11    | 10       | 4       | 1      | 239    |
| <i>B. germanica</i>    | 23   | 74   | 20   | 10    | 6        | 1       | 1      | 135    |
| <i>Z. nevadensis</i>   | 12   | 34   | 12   | 2     | 2        | 0       | 0      | 62     |
| <i>D. melanogaster</i> | 17   | 20   | 6    | 7     | 3        | 2       | 2      | 57     |

**Supplementary Table 23** The gene list of Dpp pathway

|                                     | Pame <sup>1</sup> ID     | Bger <sup>2</sup> ID                   | Dmel <sup>3</sup> ID | Supplementary notes or annotation                      |
|-------------------------------------|--------------------------|----------------------------------------|----------------------|--------------------------------------------------------|
| <b>Ligands and secreted factors</b> |                          |                                        |                      |                                                        |
| Decapentaplegic(dpp)                | PaOGS32169               | Bger_03413                             | NP_477311            | Transforming growth factor- $\beta$                    |
| <b>Receptor</b>                     |                          |                                        |                      |                                                        |
| Thickveins(tkv)                     | PaOGS25735               | Bger_01654                             | NP_787990            | Transforming growth factor beta receptor, type I       |
| Punt(put)                           | PaOGS32571               | Bger_02266<br>Bger_02267<br>Bger_27580 | NP_001262575         | transforming growth factor beta receptor, type II      |
| Saxophone(sax)                      | PaOGS16168               | Bger_01537                             | NP_001246193         | Transforming growth factor beta receptor, type I       |
| <b>Main component</b>               |                          |                                        |                      |                                                        |
| Mothers against dpp(mad)            | PaOGS13393<br>PaOGS34042 | Bger_02371<br>Bger_12546               | NP_001259992         | Mothers against decapentaplegic homolog                |
| Medea(med)                          | PaOGS21152               | Bger_05463                             | NP_524610            | Mothers against decapentaplegic-like protein           |
| schnurri(shn)                       | PaOGS24405               | Bger_12964                             | NP_001260883         | Immunodeficiency virus type I enhancer binding protein |
| brinker(brk)                        | PaOGS08043               | Bger_16123                             | NP_511069            | Brinker protein                                        |
| magu                                | PaOGS09151               | Bger_13178                             | NP_724871            | SPARC-related modular calcium-binding protein          |
| Daughters against dpp(dad)          | PaOGS13178               | Bger_02813                             | NP_477260            | Mothers against decapentaplegic homolog                |
| <b>Target genes</b>                 |                          |                                        |                      |                                                        |
| spalt major(salm)                   | PaOGS00024               | ND                                     | NP_723670            | spalt-major-like homeotic protein                      |
| spalt-related(salr)                 | ND                       | Bger_07259                             | NP_523548            | sal-like protein                                       |

|                      |            |            |              |               |
|----------------------|------------|------------|--------------|---------------|
| optomotor-blind(omb) | PaOGS25538 | Bger_01571 | NP_001259238 | T-box protein |
|                      | PaOGS09902 | Bger_01573 |              |               |
|                      | PaOGS32020 |            |              |               |
|                      | PaOGS04977 |            |              |               |

<sup>1</sup>Pame, *Periplaneta americana*, <sup>2</sup>Bger, *Blattella germanica*, <sup>3</sup>Dmel, *Drosophila melanogaster*.

**Supplementary Table 24** The gene list of JNK pathway

|                          | <b>Pame<sup>1</sup> ID</b> | <b>Bger<sup>2</sup> ID</b> | <b>Dmel<sup>3</sup> ID</b> | <b>Supplementary notes or annotation</b> |
|--------------------------|----------------------------|----------------------------|----------------------------|------------------------------------------|
| Eiger(egr)               | PaOGS04629<br>PaOGS01329   | ND                         | NP_724878                  | Tumour necrosis factor                   |
| Wengen(wgn)              | PaOGS28432                 | ND                         | NP_728186                  | Tumour necrosis factor receptor          |
| TRAF4                    | PaOGS29319                 | Bger_09414                 | NP_477416                  | TNF-receptor-associated factor 4         |
| misshapen(msn)           | PaOGS35794                 | Bger_13221<br>Bger_13222   | NP_524679                  | Serine/threonine-protein kinase          |
| TAB2                     | PaOGS00384                 | Bger_07566                 | NP_611408                  | TAK1-associated binding protein 2        |
| TAK1                     | PaOGS13569                 | Bger_05441                 | NP_524080                  | TGF- $\beta$ activated kinase 1          |
| MKK4                     | PaOGS19566                 | Bger_17239                 | NP_477353                  | MAP kinase kinase 4                      |
| puckered(puc)            | PaOGS25310                 | ND                         | NP_524273                  | serine/threonine protein phosphatase     |
| Hemipterous(hep)         | ND                         | ND                         | NP_727661                  | serine/threonine protein kinase          |
| Basket(bsk)              | PaOGS14087                 | Bger_26268                 | NP_723541                  | serine/threonine-protein kinase          |
| CKA                      | PaOGS17383                 | ND                         | NP_001245936               | Connector of kinase to AP-1              |
| alphabet(alph)           | PaOGS30503                 | Bger_20783                 | NP_651701                  | PPM-type phosphatase                     |
| pebbled(peb)             | PaOGS01751                 | Bger_16145                 | NP_476674                  | transcriptional attenuator               |
| kayak(kay)               | PaOGS04497                 | Bger_03487                 | NP_001027577               | AP-1 transcription factor                |
| Jun-related antigen(jra) | ND                         | Bger_18999                 | NP_001260844               | Jun-like transcription factor            |
| anterior open(aop)       | PaOGS22773                 | Bger_12886                 | NP_722766                  | Ets DNA-binding protein pokkuri          |
| raw                      | PaOGS03631                 | Bger_17617                 | NP_723416                  |                                          |

<sup>1</sup> Pame, *Periplaneta americana*, <sup>2</sup> Bger, *Blattella germanica*, <sup>3</sup> Dmel, *Drosophila melanogaster*.



**Supplementary Table 25** The gene list of GRH pathway

|                                    | <b>Pame<sup>1</sup> ID</b> | <b>Bger<sup>2</sup> ID</b> | <b>Dmel<sup>3</sup> ID</b> | <b>Supplementary notes or annotation</b>                                                                 |
|------------------------------------|----------------------------|----------------------------|----------------------------|----------------------------------------------------------------------------------------------------------|
| Cadherin 96Ca(Cad96Ca) stit        | PaOGS25866                 | Bger_17354                 | NP_651349                  | Tyrosine kinase receptor                                                                                 |
|                                    | PaOGS00173                 | Bger_23518                 |                            |                                                                                                          |
| Btk family kinase at 29A(Btk29A)   | PaOGS17860                 | Bger_14401                 | NP_476745                  | Tyrosine-protein kinase                                                                                  |
| Src oncogene at 64B(Src64B)        | PaOGS22161                 | Bger_03956                 | NP_524934                  | Tyrosine-protein kinase                                                                                  |
| Src oncogene at 42A(Src42A)        | PaOGS07754                 | Bger_20645                 | NP_610191                  | Tyrosine-protein kinase                                                                                  |
|                                    | PaOGS05198                 |                            |                            |                                                                                                          |
|                                    | PaOGS31132                 |                            |                            |                                                                                                          |
| grainy head(grh)                   | PaOGS03647                 | Bger_26553                 | NP_476845                  | Protein grainy head, transcription factor                                                                |
|                                    | PaOGS36540                 |                            |                            |                                                                                                          |
| downstream of receptor kinase(drk) | PaOGS19560                 | Bger_03191                 | NP_476858                  | Protein enhancer of sevenless 2B                                                                         |
| Son of sevenless                   | PaOGS26097                 | Bger_12100                 | NP_476597                  | as GTP exchange factor, son of sevenless, putative<br>Ras-specific guanine nucleotide-releasing factor 2 |
|                                    | PaOGS37301                 | Bger_16633                 |                            |                                                                                                          |
|                                    | PaOGS05185                 |                            |                            |                                                                                                          |
| rolled(rl) ERK                     | PaOGS23998                 | Bger_07900                 | NP_001015122               | ERK, dpERK, Mitogen-activated protein kinase                                                             |
|                                    | PaOGS05015                 |                            |                            |                                                                                                          |
| Dopa decarboxylase(Ddc)            | PaOGS13879                 | Bger_02884                 | NP_724163                  | Aromatic-L-amino-acid decarboxylase                                                                      |
|                                    | PaOGS24187                 | Bger_28490                 |                            |                                                                                                          |
|                                    | PaOGS24186                 |                            |                            |                                                                                                          |
| pale(ple)                          | PaOGS15510                 | Bger_19824                 | NP_476898                  |                                                                                                          |

<sup>1</sup>Pame, *Periplaneta americana*, <sup>2</sup>Bger, *Blattella germanica*, <sup>3</sup>Dmel, *Drosophila melanogaster*.

**Supplementary Table 26** The gene list of Wingless pathway

|                                | <b>Pame<sup>1</sup> ID</b> | <b>Bger<sup>2</sup> ID</b> | <b>Dmel<sup>3</sup> ID</b> | <b>Supplementary notes or annotation</b>         |
|--------------------------------|----------------------------|----------------------------|----------------------------|--------------------------------------------------|
| <b>Ligands</b>                 |                            |                            |                            |                                                  |
| Wingless(wg)                   | PaOGS25726                 | Bger_10841                 | NP_523502                  | Wnt protein                                      |
|                                | PaOGS35921                 | Bger_10842                 |                            |                                                  |
|                                | PaOGS25723                 |                            |                            |                                                  |
| <b>Receptor</b>                |                            |                            |                            |                                                  |
| Dfz2                           | PaOGS10589                 | Bger_22240                 | NP_001262037               | G-protein coupled receptor                       |
| arrow(arr)                     | PaOGS30157                 | Bger_02948                 | NP_524737                  | Low density lipoprotein receptor-related protein |
| <b>Main components</b>         |                            |                            |                            |                                                  |
| dishevelled(dsh)               | PaOGS28148                 | Bger_04903                 | NP_511118                  | Dishevelled protein                              |
| Axin(axn)                      | PaOGS15378                 | Bger_08695                 | NP_733336                  | Axin protein                                     |
|                                | PaOGS34949                 |                            |                            |                                                  |
| APC                            | PaOGS11938                 | Bger_02807                 | NP_477152                  | Adenomatous polyposis coli protein               |
|                                | PaOGS18687                 |                            |                            |                                                  |
| pangolin(pan) TCF              | PaOGS05337                 | Bger_21716                 | NP_726528                  | HMG-domain transcription factor                  |
| Casein kinase I $\alpha$ (Ck1) | PaOGS18576                 | Bger_01130                 | NP_727631                  | Casein kinase I isoform alpha                    |
|                                | PaOGS07469                 |                            |                            |                                                  |
| shaggy(sgg)                    | PaOGS21420                 | Bger_15050                 | NP_001259193               | Glycogen Synthase Kinase 3                       |
| Armadillo(arm)                 | PaOGS04090                 | Bger_25799                 | NP_476666                  | <i>Drosophila</i> homolog of beta-catenin        |
| Groucho(gro)                   | PaOGS28025                 | Bger_00142                 | NP_001189294               | transcription corepressor                        |

|            |            |
|------------|------------|
| PaOGS08566 | Bger_00145 |
| PaOGS31885 | Bger_10352 |
| PaOGS06419 |            |

<sup>1</sup>Pame, *Periplaneta americana*, <sup>2</sup>Bger, *Blattella germanica*, <sup>3</sup>Dmel, *Drosophila melanogaster*.

**Supplementary Table 27** The gene list of Notch pathway

|                                     | <b>Pame<sup>1</sup> ID</b> | <b>Bger<sup>2</sup> ID</b> | <b>Dmel<sup>3</sup> ID</b> | <b>Supplementary notes or annotation</b>     |
|-------------------------------------|----------------------------|----------------------------|----------------------------|----------------------------------------------|
| <b>Ligands</b>                      |                            |                            |                            |                                              |
| Delta(Dl)                           | PaOGS35527                 | Bger_19307<br>Bger_19308   | NP_477264                  | single pass transmembrane EGF family protein |
| Serrate(Ser)                        | PaOGS21207                 | ND                         | NP_524527                  | Jagged protein homolog                       |
| <b>Receptor</b>                     |                            |                            |                            |                                              |
| Notch(N)                            | PaOGS26746<br>PaOGS30036   | Bger_03939<br>Bger_12799   | NP_476859                  | Notch protein                                |
| <b>Main components</b>              |                            |                            |                            |                                              |
| fringe(fng)                         | PaOGS08374                 | ND                         | NP_524191                  |                                              |
| TACE                                | PaOGS26534<br>PaOGS26533   | Bger_04995<br>Bger_02155   | NP_733334                  | ADAM 17-like protease                        |
| dishevelled(dsh)                    | PaOGS28148                 | Bger_04903                 | NP_511118                  | Dishevelled-related protein                  |
| Numb                                | PaOGS17134                 | Bger_26118<br>Bger_21543   | NP_523523                  | Protein numb                                 |
| deltex(dx)                          | PaOGS02930                 | Bger_06392                 | NP_511064                  | RING finger domain protein                   |
| presenilin enhancer(pen-2)          | PaOGS19904                 | Bger_19024                 | NP_788401                  | presenilin enhancer-2 subunit                |
| Presenilin(Psn)                     | PaOGS37292                 | Bger_03812                 | NP_524184                  | Peptidase A22A                               |
| nicastrin(nct)                      | PaOGS15580                 | Bger_07196                 | NP_001262932               | Nicastrin                                    |
| anterior pharynx defective 1(aph-1) | PaOGS01429                 | Bger_13788<br>Bger_10399   | NP_608710                  | Gamma-secretase subunit                      |

|                                   |            |            |              |                                               |
|-----------------------------------|------------|------------|--------------|-----------------------------------------------|
| mastermind(mam)                   | ND         | Bger_01597 | NP_525115    | transcriptional coactivator                   |
| nejire(nej)                       | PaOGS25711 | Bger_12712 | NP_001188575 | transcriptional co-activator CBP              |
|                                   | PaOGS23031 | Bger_12714 |              |                                               |
|                                   | PaOGS35225 | Bger_12715 |              |                                               |
| Suppressor of Hairless(Su(H)) CSL | PaOGS29002 | Bger_05252 | NP_476868    | p53-like transcription factor                 |
| Hairless(H)                       | PaOGS33095 |            | NP_732533    | transcription corepressor                     |
| C-terminal Binding Protein(CtBP)  | PaOGS07498 | Bger_25687 | NP_001014617 | D-isomer specific 2-hydroxyacid dehydrogenase |
| Groucho(gro)                      | PaOGS28025 | Bger_00142 | NP_001189294 | transcription corepressor                     |
|                                   | PaOGS08566 | Bger_00145 |              |                                               |
|                                   | PaOGS31885 | Bger_10352 |              |                                               |
|                                   | PaOGS06419 |            |              |                                               |
| Histone deacetylase 1(HDAC1)      | PaOGS11542 | Bger_19443 | NP_647918    | rpd3/HDA1 lysine deacetylases                 |
|                                   | PaOGS04186 | Bger_01952 |              |                                               |

<sup>1</sup>Pame, *Periplaneta americana*, <sup>2</sup>Bger, *Blattella germanica*, <sup>3</sup>Dmel, *Drosophila melanogaster*.

**Supplementary Table 28** The gene list of Hippo pathway

|                                    | Pame <sup>1</sup> ID                                                             | Bger <sup>2</sup> ID                   | Dmel <sup>3</sup> ID | Supplementary notes or annotation |
|------------------------------------|----------------------------------------------------------------------------------|----------------------------------------|----------------------|-----------------------------------|
| <b>Signal transduction pathway</b> |                                                                                  |                                        |                      |                                   |
| aPKC                               | PaOGS04744<br>PaOGS13125                                                         | Bger_20742<br>Bger_27610               | NP_524892            | atypical protein kinase C         |
| Crumbs                             | PaOGS35189                                                                       | Bger_00824<br>Bger_10877               | NP_001247284         | crb                               |
| discs large1                       | PaOGS13391                                                                       | Bger_20914<br>Bger_20919<br>Bger_12063 | NP_001259446         | dlg                               |
| expanded                           | ND                                                                               | Bger_04976                             | NP_476840            | ex                                |
| fat                                | PaOGS09653<br>PaOGS17088<br>PaOGS31602<br>PaOGS35424<br>PaOGS36654<br>PaOGS23262 | Bger_26078<br>Bger_26079<br>Bger_26348 | NP_477497            | Cadherin-related tumor suppressor |
| Hippo                              | PaOGS21447                                                                       | Bger_07154                             | NP_611427            | Serine/threonine-protein kinase   |
| Kibra                              | PaOGS26283<br>PaOGS19729<br>PaOGS22053                                           | Bger_12889                             | NP_001034055         | protein kibra-like isoform        |

|                         |            |            |              |                                                                |
|-------------------------|------------|------------|--------------|----------------------------------------------------------------|
| Lgl                     | PaOGS16831 | Bger_12230 | NP_001245804 | lethal giant larvae                                            |
| mob as tumor suppressor | PaOGS01717 | Bger_13415 | NP_001287465 | mats                                                           |
| merlin                  | PaOGS19763 | Bger_00850 | NP_523413    | Merlin                                                         |
| Par-1                   | PaOGS31633 | Bger_11898 | NP_995894    | serine/threonine-protein kinase MARK2                          |
|                         | PaOGS31634 | Bger_18873 |              |                                                                |
| Par-6                   | PaOGS25037 | Bger_18650 | NP_573238    | partitioning defective protein 6                               |
|                         |            | Bger_18651 |              |                                                                |
| salvador                | PaOGS04317 | Bger_07756 | NP_788721    | Salvador-like protein 1                                        |
| scribbled               | PaOGS13642 | Bger_22299 | NP_001247321 | part of the conserved machinery regulating apicobasal polarity |
|                         | PaOGS21706 | Bger_22302 |              |                                                                |
|                         | PaOGS25395 |            |              |                                                                |
|                         | PaOGS35886 |            |              |                                                                |
| warts                   | PaOGS32626 | Bger_01745 | NP_733403    | tumor suppressor kinase                                        |
| yorkie                  | PaOGS02608 | Bger_18558 | NP_726414    | transcriptional coactivator yorkie-like isoform                |
|                         | PaOGS24775 | Bger_18559 |              |                                                                |

<sup>1</sup> Pame, *Periplaneta americana*, <sup>2</sup> Bger, *Blattella germanica*, <sup>3</sup> Dmel, *Drosophila melanogaster*.

**Supplementary Table 29** The gene list of Hedgehog pathway

|                                | Pame <sup>1</sup> ID     | Bger <sup>2</sup> ID     | Dmel <sup>3</sup> ID | Supplementary notes or annotation                   |
|--------------------------------|--------------------------|--------------------------|----------------------|-----------------------------------------------------|
| <b>Ligands</b>                 |                          |                          |                      |                                                     |
| Hedgehog(Hh)                   | PaOGS16066               | Bger_02232<br>Bger_02233 | NP_001034065         | Hedgehog protein                                    |
| <b>Receptor</b>                |                          |                          |                      |                                                     |
| Patched(ptc)                   | PaOGS26716<br>PaOGS26717 | Bger_14050               | NP_523661            | Protein patched                                     |
| interference hedgehog(Ihog)    | PaOGS01525               | Bger_23725               | NP_609085            | Interference hedgehog protein                       |
| smoothened(Smo)                | PaOGS29029               | Bger_01651               | NP_523443            | The seven-transmembrane protein Smoothened          |
| <b>Main components</b>         |                          |                          |                      |                                                     |
| PKA-C1                         | PaOGS33117               | Bger_01349               | NP_723479            | Protein kinase, cAMP-dependent, catalytic subunit 1 |
| Casein kinase I $\alpha$ (Ck1) | PaOGS18576<br>PaOGS07469 | Bger_01130               | NP_727631            | Casein kinase I isoform alpha                       |
| shaggy(sgg)                    | PaOGS21420               | Bger_15050               | NP_001259193         | Glycogen Synthase Kinase 3                          |
| Gprk2                          | PaOGS00819               | Bger_20197               | NP_476867            | G protein-coupled receptor kinase 2                 |
| costa(cos2)                    | PaOGS09148               | Bger_05480               | NP_477092            | Kinesin-like protein costa                          |
| fused(Fu)                      | PaOGS22218               | Bger_27845               | NP_477499            | Serine/threonine-protein kinase                     |
| Suppressor of fused(Su(fu))    | PaOGS20372               | Bger_16884               | NP_536750            |                                                     |
| cubitus interruptus(Ci)        | PaOGS24572<br>PaOGS01587 | Bger_13404               | NP_524617            | Protein cubitus interruptus                         |

<sup>1</sup> Pame, *Periplaneta americana*, <sup>2</sup> Bger, *Blattella germanica*, <sup>3</sup> Dmel, *Drosophila melanogaster*.



**Supplementary Table 30** The list of potential growth factor genes

|                                                                              | <b>Pame<sup>1</sup> ID</b>                           | <b>Bger<sup>2</sup> ID</b>             | <b>Dmel<sup>3</sup> ID</b> | <b>Supplementary notes or annotation</b>                                                                         |
|------------------------------------------------------------------------------|------------------------------------------------------|----------------------------------------|----------------------------|------------------------------------------------------------------------------------------------------------------|
| <b>EGF</b>                                                                   |                                                      |                                        |                            |                                                                                                                  |
| gurken (grk)                                                                 | ND                                                   | ND                                     | NP_476568                  | TGF $\alpha$ family signaling ligand that activates the intracellular MAP kinase pathway via the Egfr            |
| spitz (spi)                                                                  | PaOGS02437<br>PaOGS34424                             | Bger_24380                             | NP_599119                  | Spitz (Spi) is the cardinal Egfr ligand that is produced as a transmembrane precursor and processed by S and rho |
| vein (vn)                                                                    | PaOGS17053                                           | ND                                     | NP_523942                  | Vein (Vn) is a secreted neuregulin-like EGFR ligand                                                              |
| keren (krn)                                                                  | ND                                                   | ND                                     | NP_524129                  | Keren is an Egfr ligand that is processed by S and rho                                                           |
| <b>FGF</b>                                                                   |                                                      |                                        |                            |                                                                                                                  |
| Branchless (bnl)                                                             | PaOGS04463<br>PaOGS15926                             | Bger_27099                             | NP_732452                  |                                                                                                                  |
| Thisbe (Ths)                                                                 | ND                                                   | ND                                     | NP_610701                  | Thisbe (Ths) is a Fibroblast growth factor (FGF) and ligand for the FGF receptor htl                             |
| Pyramus (Pyr)                                                                | ND                                                   | ND                                     | NP_001097275               | Pyramus (Pyr) is a Fibroblast growth factor (FGF) and ligand for the FGF receptor htl                            |
| <b>platelet-derived growth factor and vascular endothelial growth factor</b> |                                                      |                                        |                            |                                                                                                                  |
| Pvf1                                                                         | PaOGS17908<br>PaOGS32182<br>PaOGS20663<br>PaOGS37354 | Bger_07155<br>Bger_08680<br>Bger_08681 | NP_523407                  | PDGF- and VEGF-related factor 1                                                                                  |
| Pvf2                                                                         | PaOGS00063                                           | ND                                     | NP_523499                  | a ligand for the Pvr receptor tyrosine kinas                                                                     |

|                                                   |            |            |              |                                                                                                                                                                                              |
|---------------------------------------------------|------------|------------|--------------|----------------------------------------------------------------------------------------------------------------------------------------------------------------------------------------------|
|                                                   | PaOGS36193 |            |              | PDGF- and VEGF-related factor 2                                                                                                                                                              |
| Pvf3                                              | PaOGS19259 | Bger_15666 | NP_001097107 | PDGF- and VEGF-related factor 3                                                                                                                                                              |
|                                                   | PaOGS36193 |            |              |                                                                                                                                                                                              |
|                                                   | PaOGS00063 |            |              |                                                                                                                                                                                              |
| <b>TGF-b (Activin)</b>                            |            |            |              |                                                                                                                                                                                              |
| Myoglianin (Myo)                                  | PaOGS30819 | Bger_15600 | NP_726604    |                                                                                                                                                                                              |
| Activin-b (Act $\beta$ )                          | PaOGS19876 | Bger_04898 | NP_651942    |                                                                                                                                                                                              |
| Dawdle (Daw)                                      | PaOGS11951 | Bger_01260 | NP_722840    | Dawdle is an Actvi- like ligand of the TGF beta superfamily. It is required for proper tricarboxylic acid cycle function in the fat body and also regulates insulin release from IPC neurons |
| <b>TGF-b (bone morphogenetic proteins (BMPs))</b> |            |            |              |                                                                                                                                                                                              |
| Glass-bottom boat (Gbb)                           | ND         | Bger_02002 | NP_477340    |                                                                                                                                                                                              |
| Decapentaplegic (Dpp)                             | PaOGS32169 | Bger_03413 | NP_477311    | Decapentaplegic is a ligand of the transforming growth factor- $\beta$ signaling pathway that signals through Smad transcription factors                                                     |
| Screw (Scw)                                       | ND         | ND         | NP_524863    | Screw (Scw) is a BMP-type ligand that forms a heterodimer with dpp                                                                                                                           |
| Maverick (Mav)                                    | PaOGS20323 | Bger_02733 | NP_524626    |                                                                                                                                                                                              |

<sup>1</sup> Pame, *Periplaneta americana*, <sup>2</sup> Bger, *Blattella germanica*, <sup>3</sup> Dmel, *Drosophila melanogaster*.

**Supplementary Table 31** PCR primers used in this paper

| <b>PCR primers for dsRNA.</b> |                                               |                                                |
|-------------------------------|-----------------------------------------------|------------------------------------------------|
| gene                          | Forward primer                                | Reverse primer                                 |
| Toll-1A                       | TAATACGACTCACTATAGGCCCC<br>ATAATTCGTCTCAAG    | TAATACGACTCACTATAGGGCTGGT<br>AGTAGTAATACAG     |
| Toll-1B                       | TAATACGACTCACTATAGGGCAA<br>TACCCGACAGCGTC     | TAATACGACTCACTATAGGCAATGG<br>AACTCGTAGCG       |
| Myd88                         | TAATACGACTCACTATAGGGTAG<br>TAGGTATGGCGGGC     | TAATACGACTCACTATAGGAATTCT<br>GCTGCTGAAGCC      |
| Dorsal                        | TAATACGACTCACTATAGGAAG<br>AACGAGATGGCAACATAG  | TAATACGACTCACTATAGGACCAGA<br>AGTAAGCAGTGCCG    |
| Akt                           | TAATACGACTCACTATAGGTTTC<br>AGACTCCCAGCCGAC    | TAATACGACTCACTATAGGCAGAAC<br>TCCAAGAGCCCAC     |
| Chitin                        | TAATACGACTCACTATAGGCCA<br>AGCCTACAGCGAAGGAG   | TAATACGACTCACTATAGGGAGCAG<br>CAAGCAGCAGAAAA    |
| EcR                           | TAATACGACTCACTATAGGCAA<br>AACGAGTATGAACAACC   | TAATACGACTCACTATAGGGAGAAA<br>ATAACAATGGCAGT    |
| RXR                           | TAATACGACTCACTATAGG<br>ACCGCTCTGTTGAGGTTAAA   | TAATACGACTCACTATAGGCAGCAT<br>CTCCATGAGGAATT    |
| Chico                         | TAATACGACTCACTATAGGGAC<br>AAGACACAAAGCACAAAC  | TAATACGACTCACTATAGGTCAGTG<br>AGACACAGCA        |
| Dsx                           | TAATACGACTCACTATAGGCGCC<br>CGCTGTAGGAACCAC    | TAATACGACTCACTATAGGCGCCGT<br>CAGACAGCACTTG     |
| InR                           | TAATACGACTCACTATAGGCTGC<br>TCAAATAGCGGATGG    | TAATACGACTCACTATAGGCATCTG<br>GGCAGTTGGGAGG     |
| Kr-h1                         | TAATACGACTCACTATAGGTCAC<br>CGACGCATCCACACC    | TAATACGACTCACTATAGGCGAACG<br>CTTTCCACAG        |
| Met                           | TAATACGACTCACTATAGGCACT<br>AATGACGTTATAACGGAC | TAATACGACTCACTATAGGGACTCA<br>GATCAGCTGGAGGTAGC |
| PI3K                          | TAATACGACTCACTATAGGCCGA<br>TGTGAGTAATGTGGC    | TAATACGACTCACTATAGGTCAAGT<br>GTGCGGTTGTAAG     |
| Tor                           | TAATACGACTCACTATAGGTTAC<br>TATTTCATATCGCTGA   | TAATACGACTCACTATAGGTGGACG<br>ACTATTTACTTA      |
| Vg                            | TAATACGACTCACTATAGGTTCA<br>TCAGTGAGTCGTGTGG   | TAATACGACTCACTATAGGATTTGG<br>GCTTTTTTGTTTTC    |
| Dpp                           | TAATACGACTCACTATAGGAAG<br>GACGGGCGGGAGAACTG   | TAATACGACTCACTATAGGCCGACA<br>ACCGCACCCCATTA    |
| Mad                           | TAATACGACTCACTATAGGTTCA<br>TACCAGGAACCCGTTT   | TAATACGACTCACTATAGGAGGAGG<br>AATCTTACAAACAG    |
| Control                       | TAATACGACTCACTATAGGGAA<br>AGCTC               | TAATACGACTCACTATAGGGAATAC<br>AGCGGCCGCGAG      |

| <b>Primers for qPCR</b> |                                 |                            |
|-------------------------|---------------------------------|----------------------------|
| gene                    | Forward primer                  | Reverse primer             |
| Toll-1A                 | CGACCACAATCACCTGACCA            | GTCACATTGCCATGGGTTGG       |
| Toll-1B                 | GCACAATGGACTGGTTGCAG            | CCGCGGTTGTAGAGGAGTTT       |
| Myd88                   | GTCAGTGGCGACAAGGTCA             | CTGGCATCAAGTCCATCTCAT      |
| Dorsal                  | ACACCGCGTTACAAGACACT            | GGCCTACCTGAATCAAGGGG       |
| Defensin-1              | TGACCTGGCGAGCATTCAA             | CGCGGACATGTTGCCTTTTT       |
| Defensin-2              | CTTCCTGGTTTTGCTCGCAC            | CTGTCCGGCTTCGGTATCTC       |
| Defensin-3              | CGTCCGCATCGCAAGAGCAA            | GGCAGTGGCAGACGCCTTGTT      |
| Defensin-4              | ACCGTGGTCCTAATCTTTCTACT<br>GG   | TCCTCCTTTGAAGCCCTTGC       |
| Defensin-5              | ACACGTCCGCATCGCAAGAT            | GCCGCACAGAAGCTGTCATTAG     |
| Attacin                 | TTTGATTGTTGCGACGGATTT           | GCCATAGTAGTCTTTGGGTACGAGAT |
| Paprp-1                 | ATCCTAGGCCAAAGCCTTTA            | TGACTAGGGTACGGAGGAC        |
| AFP                     | CTAAACTTCTGGTATTCCTTGTT<br>CTGC | TGGTCCGTAGCTCTTGTGGG       |
| Drosomycin              | TGTGCAGTATGGGATAACGACG          | CGCACCAACATTTGAGGCTAG      |
| Termicin-1              | CCTGCAAAGTTCAACTGAGT            | GATTTTAAGCATTTGTGGAAT      |
| Termicin-2              | GCACAATGCCAGTTCAATAA            | GCAGGTTCCGCTACTACAGA       |
| Akt                     | GCAAAGAAGGGATGAAACCA            | AACTCCAAGAGCCCACCAAT       |
| Chitin                  | GTCATCGTGCTCAGCTCTGG            | AGGTACGCTATCAGCAGGCA       |
| EcR                     | ACCTGAGTACCAGTGTGCAGT           | AGCTTCTCTGGCTCTGCCTT       |
| RXR                     | TCTGCCAGGCGACAAACAAG            | AGCACCTGGTCTGAGAGTGG       |
| PI3K                    | AGTTACTGGCAACAGACGGA            | CGTGAGCATTCTCGTAGCAG       |
| Chico                   | CTCCTCCGAAAGTTCCACCC            | TCGCAAAGAGGAACTGGGAC       |
| Dsx                     | AGGAACCACCGCCTCAAGATAG          | CTCCGCCGTCAGACAGCACT       |
| InR                     | ATCGAAATGGAAGCAAAGGT            | GGTAGGGTTGTTTCAGCTAATGT    |
| Kr-h1                   | GCGGCCCTACAAGTGCGATAT           | CGAGTTGCCCGCTCTGTATGAA     |
| Met                     | TCAGGTAAGGGTCCCGATGT            | AGCTGGAGGTAGCAATTCACA      |
| PI3K                    | ACATCCCAAGAAATTCAGTTG           | CCTCACGCTGGTACTTATCC       |
| Tor                     | TGCACGACAAGAGCACATAA            | TTGGCAGACACTTTAGACTTCA     |
| Vg                      | GTGGTCATCTCAGGCACATTG           | GATAAGTCCTTTCTGGCTGTTGT    |
| Dpp                     | ACGTCGATGAAGACGTCAAG            | CGCACGTTTGGACCTACTTA       |
| Mad                     | AATGGAGGTCCTGGGAATCA            | ATGCAGGAGGAGGAGTTTCT       |
| Actin                   | CATCCTGCGTTTGGATCTGG            | TTTCTCGTTCGGCAGTGGTG       |

## Supplementary References

1. Terrapon, N. et al. Molecular traces of alternative social organization in a termite genome. *Nature Commun.* **5**, 3636(2014)
2. Poulsen, M. et al. Complementary symbiont contributions to plant decomposition in a fungus-farming termite. *Proc. Natl Acad. Sci. USA* **111**, 14500 (2014)
3. Wang, X. et al. The locust genome provides insight into swarm formation and long-distance flight. *Nature Commun.* **5**, 2957(2014)
4. Harrison, M. C. et al. Hemimetabolous genomes reveal molecular basis of termite eusociality. *Nature Ecology & Evolution* (2018), in press.
5. Zhan, S., et al. The monarch butterfly genome yields insights into long-distance migration. *Cell* **147**, 1171-1185 (2011).
6. *Tribolium* Genome Sequencing Consortium. The genome of the model beetle and pest *Tribolium castaneum*. *Nature* **452**, 949-955 (2008).
7. The Honeybee Genome Sequencing Consortium. Insights into social insects from the genome of the honeybee *Apis mellifera*. *Nature* **443**, 931-949 (2006).
8. Chen, W., et al. The draft genome of whitefly *Bemisia tabaci* MEAM1, a global crop pest, provides novel insights into virus transmission, host adaptation, and insecticide resistance. *BMC Biol.* **14**, 110 (2016).
9. Mesquita, R. D., et al. Genome of *Rhodnius prolixus*, an insect vector of Chagas disease, reveals unique adaptations to hematophagy and parasite infection. *Proc. Natl Acad. Sci. USA* **112**, 14936-14941 (2015).
10. Kirkness, E. F., et al. Genome sequences of the human body louse and its primary endosymbiont provide insights into the permanent parasitic lifestyle. *Proc. Natl Acad. Sci. USA* **107**, 12168–12173 (2010).
